# Supplementary material for: A secure remote user authentication scheme for 6LoWPAN-based Internet of Things
Source: PLoS One. 2021 Nov 8;16(11):e0258279. doi: 10.1371/journal.pone.0258279 (PMC8575280; doi:10.1371/journal.pone.0258279)
Supplement: S1 Appendix — (ZIP) [file pone.0258279.s018.zip]

Archive with 2 entries (2 files):
- Supporting_information.pdf
- Supporting_information.tex
