# Supplementary material for: A secure remote user authentication scheme for 6LoWPAN-based Internet of Things
Source: PLoS One. 2021 Nov 8;16(11):e0258279. doi: 10.1371/journal.pone.0258279 (PMC8575280; doi:10.1371/journal.pone.0258279)
Supplement: S1 Appendix — (ZIP) [file pone.0258279.s018.zip › Supporting_information.tex]

% Template for PLoS
% Version 3.5 March 2018
%
% % % % % % % % % % % % % % % % % % % % % %
%
% -- IMPORTANT NOTE
%
% This template contains comments intended 
% to minimize problems and delays during our production 
% process. Please follow the template instructions
% whenever possible.
%
% % % % % % % % % % % % % % % % % % % % % % % 
%
% Once your paper is accepted for publication, 
% PLEASE REMOVE ALL TRACKED CHANGES in this file 
% and leave only the final text of your manuscript. 
% PLOS recommends the use of latexdiff to track changes during review, as this will help to maintain a clean tex file.
% Visit https://www.ctan.org/pkg/latexdiff?lang=en for info or contact us at latex@plos.org.
%
%
% There are no restrictions on package use within the LaTeX files except that 
% no packages listed in the template may be deleted.
%
% Please do not include colors or graphics in the text.
%
% The manuscript LaTeX source should be contained within a single file (do not use \input, \externaldocument, or similar commands).
%
% % % % % % % % % % % % % % % % % % % % % % %
%
% -- FIGURES AND TABLES
%
% Please include tables/figure captions directly after the paragraph where they are first cited in the text.
%
% DO NOT INCLUDE GRAPHICS IN YOUR MANUSCRIPT
% - Figures should be uploaded separately from your manuscript file. 
% - Figures generated using LaTeX should be extracted and removed from the PDF before submission. 
% - Figures containing multiple panels/subfigures must be combined into one image file before submission.
% For figure citations, please use "Fig" instead of "Figure".
% See http://journals.plos.org/plosone/s/figures for PLOS figure guidelines.
%
% Tables should be cell-based and may not contain:
% - spacing/line breaks within cells to alter layout or alignment
% - do not nest tabular environments (no tabular environments within tabular environments)
% - no graphics or colored text (cell background color/shading OK)
% See http://journals.plos.org/plosone/s/tables for table guidelines.
%
% For tables that exceed the width of the text column, use the adjustwidth environment as illustrated in the example table in text below.
%
% % % % % % % % % % % % % % % % % % % % % % % %
%
% -- EQUATIONS, MATH SYMBOLS, SUBSCRIPTS, AND SUPERSCRIPTS
%
% IMPORTANT
% Below are a few tips to help format your equations and other special characters according to our specifications. For more tips to help reduce the possibility of formatting errors during conversion, please see our LaTeX guidelines at http://journals.plos.org/plosone/s/latex
%
% For inline equations, please be sure to include all portions of an equation in the math environment.  For example, x$^2$ is incorrect; this should be formatted as $x^2$ (or $\mathrm{x}^2$ if the romanized font is desired).
%
% Do not include text that is not math in the math environment. For example, CO2 should be written as CO\textsubscript{2} instead of CO$_2$.
%
% Please add line breaks to long display equations when possible in order to fit size of the column. 
%
% For inline equations, please do not include punctuation (commas, etc) within the math environment unless this is part of the equation.
%
% When adding superscript or subscripts outside of brackets/braces, please group using {}.  For example, change "[U(D,E,\gamma)]^2" to "{[U(D,E,\gamma)]}^2". 
%
% Do not use \cal for caligraphic font.  Instead, use \mathcal{}
%
% % % % % % % % % % % % % % % % % % % % % % % % 
%
% Please contact latex@plos.org with any questions.
%
% % % % % % % % % % % % % % % % % % % % % % % %

\documentclass[10pt,letterpaper]{article}
\usepackage[top=0.85in,left=2.75in,footskip=0.75in]{geometry}

% amsmath and amssymb packages, useful for mathematical formulas and symbols
\usepackage{amsmath,amssymb}

% Use adjustwidth environment to exceed column width (see example table in text)
\usepackage{changepage}

% Use Unicode characters when possible
\usepackage[utf8x]{inputenc}

% textcomp package and marvosym package for additional characters
\usepackage{textcomp,marvosym}

% cite package, to clean up citations in the main text. Do not remove.
\usepackage{cite}

% Use nameref to cite supporting information files (see Supporting Information section for more info)
\usepackage{nameref,hyperref}

% \usepackage{natbib,stfloats}
\usepackage{mathrsfs}
\usepackage{array,graphicx}
\usepackage{amssymb}
\usepackage{amsmath}
\usepackage[table]{xcolor}
\newcommand*\rot{\rotatebox{45}}
\newcommand*\OK{\ding{51}}
\usepackage{caption}
%\usepackage{refcheck}

\newtheorem{prop}{Proposition}
\usepackage{amsmath}
\usepackage{booktabs} % To thicken table lines
\usepackage{mathtools}
\usepackage{soul}
\usepackage{float}
\def\newblock{\hskip .11em plus .33em minus .07em}
\usepackage{multirow}
\newtheorem{theorem}{Theorem}[section]
\newtheorem{proof}[theorem]{proof}
% line numbers
\usepackage[right]{lineno}

% ligatures disabled
\usepackage{microtype}
\DisableLigatures[f]{encoding = *, family = * }

% color can be used to apply background shading to table cells only
\usepackage[table]{xcolor}

% array package and thick rules for tables
\usepackage{array}

% create "+" rule type for thick vertical lines
\newcolumntype{+}{!{\vrule width 2pt}}

% create \thickcline for thick horizontal lines of variable length
\newlength\savedwidth
\newcommand\thickcline[1]{%
  \noalign{\global\savedwidth\arrayrulewidth\global\arrayrulewidth 2pt}%
  \cline{#1}%
  \noalign{\vskip\arrayrulewidth}%
  \noalign{\global\arrayrulewidth\savedwidth}%
}

% \thickhline command for thick horizontal lines that span the table
\newcommand\thickhline{\noalign{\global\savedwidth\arrayrulewidth\global\arrayrulewidth 2pt}%
\hline
\noalign{\global\arrayrulewidth\savedwidth}}


% Remove comment for double spacing
%\usepackage{setspace} 
%\doublespacing

% Text layout
\raggedright
\setlength{\parindent}{0.5cm}
\textwidth 5.25in 
\textheight 8.75in

% Bold the 'Figure #' in the caption and separate it from the title/caption with a period
% Captions will be left justified
\usepackage[aboveskip=1pt,labelfont=bf,labelsep=period,justification=raggedright,singlelinecheck=off]{caption}
\renewcommand{\figurename}{Fig}

% Use the PLoS provided BiBTeX style
\bibliographystyle{plos2015}

% Remove brackets from numbering in List of References
\makeatletter
\renewcommand{\@biblabel}[1]{\quad#1.}
\makeatother


% Header and Footer with logo
\usepackage{lastpage,fancyhdr,graphicx}
\usepackage{epstopdf}
%\pagestyle{myheadings}
\pagestyle{fancy}
\fancyhf{}
%\setlength{\headheight}{27.023pt}
%\lhead{\includegraphics[width=2.0in]{PLOS-submission.eps}}
\rfoot{\thepage/\pageref{LastPage}}
\renewcommand{\headrulewidth}{0pt}
\renewcommand{\footrule}{\hrule height 2pt \vspace{2mm}}
\fancyheadoffset[L]{2.25in}
\fancyfootoffset[L]{2.25in}
\lfoot{\today}

%% Include all macros below

\newcommand{\lorem}{{\bf LOREM}}
\newcommand{\ipsum}{{\bf IPSUM}}

%% END MACROS SECTION


\begin{document}
\vspace*{0.2in}

% Title must be 250 characters or less.
\begin{flushleft}
{\Large
\textbf\newline{Supporting Information}
 % Please use "sentence case" for title and headings (capitalize only the first word in a title (or heading), the first word in a subtitle (or subheading), and any proper nouns).
}
% \newline
% % Insert author names, affiliations and corresponding author email (do not include titles, positions, or degrees).
% \\
% % \Author{Muhammad Tanveer $^{1}$, Ghulam Abbas  $^{2}$, Ziaul Haq Abbas $^{3}$,  Muhammad Waqas$^{4}$}
% Ghulam Abbas\textsuperscript{1,2},
% Muhammad Tanveer\textsuperscript{2},
% Ziaul Haq Abbas\textsuperscript{3},
% Muhammad Waqas\textsuperscript{4},
% Thar Baker\textsuperscript{5},
% Dhiya Al-Jumeily\textsuperscript{6,*}

% % Muhammad Tanveer\textsuperscript{1,2\Yinyang},
% % Ghulam Abbas \textsuperscript{2\Yinyang},
% % Ziaul Haq Abbas \textsuperscript{3\textcurrency},
% % Muhammad Waqas\textsuperscript{4}
% % Name5 Surname\textsuperscript{2\ddag},
% % Name6 Surname\textsuperscript{2\ddag},
% % Name7 Surname\textsuperscript{1,2,3*},
% % with the Lorem Ipsum Consortium\textsuperscript{\textpilcrow}
% % \\
% \bigskip
% \textbf{1} Faculty of Computer Science and Engineering, GIK Institute of Engineering Sciences and Technology, Topi 23640, Pakistan; E-mail: abbasg@giki.edu.pk.
% \\
% \textbf{2} Telecommunications and Networking Research Center, GIK Institute of Engineering Sciences and Technology, Topi 23640, Pakistan; E-mail: tanveer.m@giki.edu.pk.
% \\
% \textbf{3} Faculty of Electrical Engineering, GIK Institute of Engineering Sciences and Technology, Topi 23640, Pakistan; E-mail: ziaul.h.abbas@giki.edu.pk.
% \\
% \textbf{4} Engineering Research Center of Intelligent Perception and Autonomous Control, Faculty of Information Technology, Beijing University of Technology, Beijing 100124, China; E-mail: engr.waqas2079@gmail.com.
% \\
% \textbf{5} Department of Computer Science, University of Sharjah, Sharjah 27272, United Arab Emirates; E-mail: tshamsa@sharjah.ac.ae.
% \\
% \textbf{6} School of Computer Science and Mathematics, Liverpool John Moores University, Liverpool L3 3AF, UK; E-mail: d.aljumeily@ljmu.ac.uk.
% \\
% \bigskip

% % Insert additional author notes using the symbols described below. Insert symbol callouts after author names as necessary.
% % 
% % Remove or comment out the author notes below if they aren't used.
% %
% % Primary Equal Contribution Note
% % \Yinyang All authors contributed equally to this work.
% All authors contributed equally to this work.

% % Additional Equal Contribution Note
% % Also use this double-dagger symbol for special authorship notes, such as senior authorship.
% % \ddag These authors also contributed equally to this work.

% % % Current address notes
% % \textcurrency Current Address: Dept/Program/Center, Institution Name, City, State, Country % change symbol to "\textcurrency a" if more than one current address note
% % % \textcurrency b Insert second current address 
% % % \textcurrency c Insert third current address

% % % Deceased author note
% % \dag Deceased

% % % Group/Consortium Author Note
% % \textpilcrow Membership list can be found in the Acknowledgments section.

% % Use the asterisk to denote corresponding authorship and provide email address in note below.
% * d.aljumeily@ljmu.ac.uk

\end{flushleft}
% Please keep the abstract below 300 words
% \section*{Abstract}
% One of the significant challenges in the Internet of Things (IoT) is the provisioning of guaranteed security and privacy, considering the fact that IoT devices are resource-limited.	Oftentimes, in IoT applications, remote users need to obtain real-time data, with guaranteed security and privacy, from resource-limited network nodes through the public Internet. For this purpose, the users need to establish a secure link with the network nodes. Though the IPv6 over low-power wireless personal area networks (6LoWPAN) adaptation layer standard offers IPv6 compatibility for resource-limited wireless networks, the fundamental 6LoWPAN structure ignores security and privacy characteristics. {Thus, there is a pressing need} to design a resource-efficient authenticated key exchange (AKE) scheme for ensuring secure communication in 6LoWPAN-based resource-limited networks. This paper proposes a resource-efficient secure remote user authentication scheme for 6LoWPAN-based IoT networks, called SRUA-IoT. SRUA-IoT achieves the authentication of remote users and enables the users and network entities to establish private session keys between themselves for indecipherable communication. To this end, SRUA-IoT uses a secure hash algorithm, exclusive-OR operation, and symmetric encryption primitive. We prove through informal security analysis that SRUA-IoT is secured against a variety of malicious attacks. We also prove the security strength of SRUA-IoT through formal security analysis conducted by employing the random oracle model. Additionally, we prove through Scyther-based validation that SRUA-IoT is resilient against various attacks. Likewise, we demonstrate that SRUA-IoT reduces the computational cost of the nodes and communication overheads of the network.

% % Please keep the Author Summary between 150 and 200 words
% % Use first person. PLOS ONE authors please skip this step. 
% % Author Summary not valid for PLOS ONE submissions.   
% % \subsection{Author summary}
% % Lorem ipsum dolor sit amet, consectetur adipiscing elit. Curabitur eget porta erat. Morbi consectetur est vel gravida pretium. Suspendisse ut dui eu ante cursus gravida non sed sem. Nullam sapien tellus, commodo id velit id, eleifend volutpat quam. Phasellus mauris velit, dapibus finibus elementum vel, pulvinar non tellus. Nunc pellentesque pretium diam, quis maximus dolor faucibus id. Nunc convallis sodales ante, ut ullamcorper est egestas vitae. Nam sit amet enim ultrices, ultrices elit pulvinar, volutpat risus.

% \linenumbers
% \section{Introduction}

% {Low-power wireless personal area networks (LoWPANs) have found numerous applications in the Internet of Things (IoT)\cite{Raja18}. LoWPAN devices are amenable with IEEE 802.15.4 and are constricted in power, communication, data rate, and storage resources \cite{liu2020addressless}. IEEE 802.15.4-enabled LoWPAN devices are deployed in various real-world applications, such as home automation, healthcare systems, security surveillance,  smart grids, and industrial motoring.  To provide Internet connectivity to a large number of devices deployed in a particular IoT environment, the IPv6 protocol is considered the most accordant solution because of its larger address space to render a unique IP address to each sensor node. By using IPv6 addressing, sensor nodes can transmit sensed information to other devices or to a central location through the public Internet.}

% To support large-scale connectivity for IoT, the Internet Engineering Task Force has designed IPv6-over-LoWPAN (6LoWPAN) adaptation layer to render packet fragmentation, reassembly, and encapsulation features for IEEE 802.15.4-based LoWPAN networks \cite{thubert20196lowpan, verma2020security}. Since LoWPAN devices collect information and send to a designated location via the public Internet, it is imperative for LoWPAN applications to provide security and privacy. However, the basic 6LoWPAN design does not provide security and privacy features to preclude an unauthorized network entity from procuring the collected information and to prevent illegitimate users from accessing the 6LoWPAN network resources \cite{oliveira2016network, glissa20196lowpsec,meneghello2019iot,9039624,9446180}. 

% 6LoWPANs encounter the same security attacks as the traditional networks. These include denial-of-service (DoS), replay, user/server impersonation (UI/SI), man-in-the-middle (MITM), identity guessing (IG), user anonymity (UA), user/device impersonation (UI/DI), stolen smart card/device (SSC/SSD), and ephemeral secret leakage (ESL) attacks. However, due to the resource-constricted nature of 6LoWPANs and the inadequacy of organized network architectures, securing 6LoWPAN becomes more challenging \cite{tanveer2020s6ae}. Authentication, availability, integrity, data freshness, and confidentiality are imperative security provisions in 6LoWPANs. Confidentiality guarantees secure data transmission between authorized users and servers. Authentication and key establishment (AKE) is the mechanism to identify devices' and users' legitimacy in 6LoWPANs \cite{oliveira2013network} and to set up a secret session key (SK) for encrypted communication. Therefore, a lightweight AKE mechanism becomes imperative for securing the network \cite{tomic2017survey,mavani2020resilient,alloghani2019systematic,al2020efficient,baker2020secure,7152582,tanveer2020lake,zhang2020lightweight,9446966}.

% \begin{table}[ht]
% 	\caption{Comparative analysis of eminent AKE schemes}
	
% \scalebox{0.65}{\begin{tabular}{m{9em}m{10cm}m{4em}m{4cm}}
% 			%\hline \hline
% 			\toprule\toprule[0.03cm] 
% 			\textbf{AKE scheme}  & \textbf{Shortcoming}	&\textbf{Year}&\textbf{Operations}  \\   \hline 
			
% 			%     		Kim $et ~ al.$\cite{kim2019udipp} &2020&XOR, ECC, AES, and SHA-256 & Cannot render protection against forgery, replay, PG, PI, DoS, SI, and SK security attacks. \\ \hline
			
% 			%     		Sarker $et~al.$\cite{sarker2018secure}&2018 &XOR and SHA-160 & Cannot render protection against forgery, replay, PG, PI, DoS, SI, and SK security attacks. \\ \hline
% 			Qui and Ma \cite{qiu2016mutual}& Unsafe against sinkhole and chosen plaintext attacks&2016&XOR, ECC, and SHA-160  \\ \hline
			
% 			Challa $et ~ al.$\cite{challa2017secure}  & Prone to replay, DoS, forgery and UI attacks&2017& ECC, XOR, and SHA-160 \\ \hline
% 						 {Vijayakumar $et ~ al.$\cite{7327222} }&  { Cannot resist replay attack and does not provide strong privacy}&{2017}&{ XOR, AES, and SHA-160} \\ \hline

% 			Jung $et ~ al.$\cite{jung2017efficient} & Cannot resist against UI and ESL attacks&2017&XOR and SHA-160 \\ \hline
% 			Qi $et ~ al.$\cite{qi2017efficient} & Fragile to PC, PI, UI, UA and offline PG attacks and also does not provide MA&2017&XOR and SHA-160\\ \hline
% 			Chaudhry $et ~ al.$\cite{chaudhry2018enhanced} & Vulnerable to offline PG, SSC,  UI, and UA attacks&2018&XOR and SHA-160  \\ \hline
			
% 			Chen $et ~ al.$\cite{chen2018lightweight}&Does not render MA and anonymity features. Prone to replay, SSD, PI, PG, UI, and  DoS attacks &2018&XOR, ECC, and SHA-160  \\ \hline
% 			Amin $et ~ al.$\cite{amin2018robust}&Cannot resist  PI,  UI, PG, and IG attacks &2018&XOR and SHA-160 \\ \hline
% 			Das $et ~ al.$\cite{das2019provably} & Does not render the SK's security. Fragile to SSD and traceability attacks &2018&XOR and SHA-160  \\ \hline
% 			Das $et ~ al.$\cite{das2018biometrics} & Susceptible to  device impersonation and MITM attacks&2018&XOR, ECC, and SHA-160 \\ \hline
% 			Shin $et ~ al.$\cite{shin2019lightweight}& Unprotected against de-synchronization attack and suffers a design flaw&2019&XOR and SHA-256   \ \\ \hline
% 			Lu $et ~ al.$\cite{lu2019robust} & Prone to UI and SCC and does not provide a login phase&2019&XOR, ECC, and SHA-160 \\ \hline
% 			Srinivas $et ~ al.$\cite{srinivas2019tcalas} &   Does not scale well. Susceptible to traceability, UI,  and DI attacks&2019&XOR and SHA-160 \\ \hline
% 						 {Mishra $et ~ al.$\cite{9199812} }&  {Prone to SSD, stolen verifier, UI, and UA  attacks and unable to ensure SN's anonymity} &{2018}&{ XOR, AES, and SHA-160} \\ \hline

% 			Wazid $et ~ al.$\cite{wazid2018design} &Prone to UI, IG, and DI attacks &2018&XOR and SHA-160 \\ \hline
% 			Shuai $et ~ al.$\cite{shuai2019anonymous}  & Prone to parallel session, UI, PG, PI, and SSD attacks&2019&XOR, ECC, and SHA-160 \\ \hline
% 			Shin	$et ~ al.$\cite{shin2019lightweight} & Suffers a design flaw and  prone to de-synchronization&2019&XOR and SHA-160 \\ \hline
% 			Barman	$et ~ al.$\cite{barman2019secure}  & Fragile to SI, UI, ESL, SK leakage, and UA attacks&2019&XOR and SHA-160  \\ \hline
% 			Singh $et ~ al.$\cite{singh2019efficient}&  Susceptible to UA, MITM, UI, SI, and modification attacks, and does not render untraceability, MA, and SK agreement features&2019&XOR and SHA-160 \\ \hline
% 			Sadhukhan $et ~ al.$\cite{sadhukhan2021lightweight} & does not provide password change mechanism. Vulnerable to replay, UA, DoS, and MITM attacks &2021&XOR, ECC, and SHA-160 \\ \hline
% 			Ali $et ~ al.$\cite{ali2020securing} & Unprotected against DoS, forgery, PI, SSD, and SI attacks, and does not render PFS and key freshness features&2020&XOR, AES, and SHA-16 \\ \hline
			
% 			 {Vinoth $et ~ al.$\cite{9199812} }&  {Unable to restrain SSD, DoS, replay, and SN capture attacks} &{2020}&{ XOR, AES, and SHA-160} \\ \hline

% 			Tanveer $et ~ al.$\cite{tanveer20206le} & Cannot resist de-synchronization attack&2020& XOR, ASCON, and SHA-256 \\ \hline
		
% 			The proposed scheme (SRUA-IoT) & Can withstand all known attacks. However, the computational cost can be reduced further&2021& XOR, AES-192, and SHA-160 \\ \hline
			
% 			\toprule	\toprule[0.03cm] 
% 			%\hline \hline
% 	\end{tabular}}
% 	\label{tab:sruasumm}
% 	\footnotesize {MA: Mutual authentication, PC: Password change, PG: Password guessing, PI: Privileged insider.}
% \end{table}


% \subsection{Related work}\label{RW}
% An overview of the existing AKE schemes for 6LoWPAN-based IoT networks and their limitations is presented in Table \ref{tab:sruasumm}, which shows that no existing scheme can withstand all known attacks.
%  {Pandi $et ~ al.$\cite{vijayakumar2015cpav} propounded an authentication scheme for vehicular ad-hoc networks (VANETs) to enable the network entities to communicate securely. The scheme presented by Pandi $et ~ al.$ is efficient in terms of certificate computation while preserving privacy of the entities.  
% 	Pandi $et ~ al.$\cite{vijayakumar2019efficient} presented an AKE scheme for IoT-based  wireless body area networks (WBANs), which is computationally less expensive and ensures secure communication. 
% 	Azees $et ~ al.$\cite{azees2021efficient} propounded an anonymous authentication scheme for WBANs, which is capable of resisting various covert security attacks while requiring fewer resources.
% 	Azees $et ~ al.$\cite{maria2021bbaas} presented a blockchain based authentication scheme for VANETs, which is capable of resisting different security attacks and renders secure communication in VANETs. }

% {The authors in \cite{9199812} propounded a multi-factor AKE scheme for the IoT environment. The AKE scheme proffered in \cite{9199812} uses a lightweight hash function along with advanced encryption standard (AES). However, the scheme is unable to restrain SSD, DoS, replay, and sensor node (SN) capture attacks. A Chinese remainder theorem-based authentication scheme is presented in \cite{7327222}, which cannot resist replay attack and does not provide strong privacy. In addition, a signature and certificate-based computationally efficient authentication scheme for VANETs is presented in  \cite{vijayakumar2017computationally}. The authors in  \cite{mishra2018efficient} propounded a resource-efficient AKE scheme for the IoT environment by utilizing hash function and XOR operation. However, the AKE scheme presented in  \cite{mishra2018efficient} is prone to SSD, stolen verifier, UI, and UA  attacks and is unable to ensure SN's anonymity. An AKE scheme is propounded in \cite{8320857} for mobile networks. The scheme proposed in \cite{8320857} is resource-efficient and is suitable for mobile networks. A cosine similarity-based AKE scheme for the IoT environment is proposed in \cite{9225061}. Furthermore, to enable security and privacy in different IoT-based networks, various AKE schemes are reported in the exiting literature \cite{zhang2020lightweight,9113685,das2020designing,park20182pakep,gao2020efficient,abbas2019mechanism,ali2019joint,banerjee2020efficient,qiu2018secure,alzahrani2020privacy,chaudhry2020secure,lee2020three,ali2020robust,liu2017secure,7961213,dey2019session,kumar2015lightweight,majumder2020ecc}.}

%  Additionally, the security analysis of an eminent AKE scheme presented in \cite{shin2019lightweight} is given at Appendix \ref{APP}. We have thoroughly analyzed the scheme and demonstrate that it is unsafe against de-synchronization attack and does not provide a revocation phase (RP). In \cite{shin2019lightweight}, gateway broadcasts the authentication message to all sensor nodes deployed in the network, and a user does not specify the sensor node from which it is going to procure the information. Thus, all the sensor nodes in the network  process the received message, which causes an extra computational overhead for every node. 


% \subsection{Research contributions}
% {This paper presents a resource-efficient secure remote user authentication scheme for 6LoWPAN-based IoT networks (SRUA-IoT). The proposed scheme performs user authorization before procuring real-time data from sensors stationed in the 6LoWPAN-based IoT networks. The scheme employs a lightweight secure hash algorithm (SHA-160) and  advanced encryption standard (AES-192) to accomplish the AKE process and makes the following contributions.}
% \begin{enumerate}
% 	\item {SRUA-IoT is an AES and hash function based remote user AKE scheme for 6LoWPAN-based IoT networks, which  renders user revocation and password change  phases. Besides, SRUA-IoT ensures the legitimacy of remote users (RUs) to access real-time information from a sensor node while ensuring the privacy and anonymity of RUs. An RU indicates to the gateway a particular sensor node for procuring real-time information, which reduces the unnecessary computational overhead. }  
% 	\item {SK's security in SRUA-IoT is corroborated using random oracle model (ROM). Informal security validation illustrates that  SRUA-IoT is protected against SSC, de-synchronization, replay, and DoS attacks. In addition, Scyther tool analysis illustrates that the proposed scheme is protected. }
% 	\item  {We demonstrate that SRUA-IoT renders enhanced security functionalities aside from its low storage, computational, and communication costs, as compared to well-known AKE schemes. }
	
% \end{enumerate}

% \subsection{Paper organization}
% The remainder of this paper is organized as follows. The system model is presented in Section \ref{SM}.
% %   An overview of Shin $et~al$ scheme is presented in Section \ref{RS}. 
% The proposed SRUA-IoT scheme is elaborated in Section \ref{ARUA}. Security analysis is presented in Section \ref{SA}. Performance evaluation of SRUA-IoT is detailed in Section \ref{PE}. Finally, the paper is concluded in Section \ref{cn}. 


% % \begin{figure}[H]
% % 	\centering
% % %   	\includegraphics[width=0.50\textwidth]{}
% % 	\caption{A 6LoWPAN based smart home network.}
% % 	\label{fig:auake}
% % \end{figure}

% \section{System Model} \label{SM}
% % Fig. \ref{fig:auake} depicts a 6LoWPAN-based SH environment as the network model for SRUA-IoT. 
% The network model consists of a gateway $GW$, a registration center (RC), and remoter users ($RU_{y}|y=1,2,3,\cdots,N$). In the SH environment, sensor nodes ($SN_{x}|x=1,2,3,\cdots,n$) are deployed to monitor various processes. $SN_{x}$ collect critical information and forward to the server stationed at RC. RC is responsible for the deployment of $SN_{x}$ and implementing various access control policies in SH. Before procuring real-time information from  $SN_{x}$, it is necessary for $RU_{y}$ to register with RC. After registration, $RU_{y}$ can access the network resources and the allocated $SN_{x}$. It is assumed that all network nodes are time synchronized.

% The well-established Dolev Yao (DY) threat model \cite{dolev1983security} is employed, wherein an adversary $\mathcal{A}$ can intercept communications between two network entities communicating via a public channel. $\mathcal{A}$ can modify the intercepted messages or use the message for various malicious purposes. $\mathcal{A}$ can procure the secret credentials stored in a sensor node's memory. Furthermore, $\mathcal{A}$ can obtain $RU_{y}$'s smart device $SD_{y}$ and can extract secret credentials form $SD_{y}$ to execute various security attacks. 

% $RU_{y}$ needs to communicate with $SN_{x}$ to securely procure the real-time information collected by $SN_{x}$. Therefore, an AKE scheme is imperative for secure and reliable communications between  $RU_{y}$ and $SN_{x}$. To achieve reliable and secure communication, the following section presents an $RU_{y}$ AKE scheme, called SRUA-IoT.

% % \begin{remark}
% % 	SHA is irreversible function, it means that it is impossible to derive the input from the output of SHA. It is collision resistance function. The output of a SHA function can never be same for different inputs. Advanced Encryption Standard (AES-192) is used as the encryption and decryption scheme in the proposed SRUA-IoT.
% % \end{remark}

% % \begin{remark}
% % 	Fuzzy Extractor (FE) is employed in the proposed SRUA-IoT to perform the local authentication of $RU_{y}$..
% % \end{remark}

% \section{The Proposed SRUA-IoT Scheme}\label{ARUA}
% SRUA-IoT seeks to ensure reliable and secure access to 6LoWPAN network resources. The scheme first verifies the authenticity of $RU_{y}$ and then establishes a secret SK for encrypted communication by employing a lightweight hash function and AES-192 during the AKE process. SHA is an irreversible function, which means that it is impossible to derive the input from the output of SHA-160. Moreover, SHA-160 is a collision resistance function, which means that the output of SHA-160 can never be the same for different inputs. AES-192  is used as the encryption and decryption scheme in SRUA-IoT. SRUA-IoT is composed of seven phases, which are presented in the following subsections. Table \ref{tab:ARUA-n} lists the notations used in this paper.

% \begin{table}[ht]
% 	\caption{ List of key notations}
% 	\centering
% 	\begin{tabular}{m{2.5cm}m{8.3cm}}
% 		%\hline \hline
% 		\toprule	\toprule[0.03cm] 
% 		\textbf{Notation}& \textbf{Description}\\\hline
% 		$GK_{}$, $ID_{G}$& Gateway-secret key and identity of gateway, respectively \\\hline
% 		$ID_{RU_{y}}$, $PS_{RU_{y}}$& Identity and password of $RU_{y}$, respectively \\\hline
% 		$PID^{x}$, $PID^{x+1}$, $TS_{RU_{y}}$ &Pseudonyms (old \& new) used during AKE and  temporal-secret of $RU_{y}$\\\hline
% 		$PID_{SN_{x}}$, $TS_{SN_{x}}$  & Pseudo-identity and temporal-secret of $SN_{x}$, respectively \\\hline
% 		$T_{x}$, $T_{y}$, $T_{z}$ & Timestamps used during the AKE phase \\\hline
% 		$E_{EK}(st)$, $D_{DK}(st)$& Encryption/decryption of string $st$, respectively \\\hline
% 		$R_{1}$, $R_{2}$, $R_{3}$ &Random number used during the AKE phase \\\hline
% 		$\parallel$, $\oplus$, $H(.)$ &Concatenation, XOR, and hash-function, respectively  \\\hline
% 		$Gen(.)$, $Rep(.)$, $Rp$, $\beta_{k}$ &FE bio-metric key generation, regeneration, reproduction parameter, and bio-metric key, respectively\\\hline
% 		$B_{RU_{y}}$ &Bio-metric information of $RU_{y}$\\\hline
% 		\toprule	\toprule[0.03cm] 
% 		%\hline \hline
% 	\end{tabular}
% 	\label{tab:ARUA-n}
% \end{table}  
% \subsection{Sensor node deployment phase}
% RC assigns various secret credentials to $SN_{x}$ before its deployment in the 6LoWPAN network. Moreover, RC selects a {$GW$'s secret Key ($GK$)} of 512 bits and a unique identity $ID_{G}$. Both $GK$ and $ID_{G}$ are known only to $GW$. RC executes the following steps to accomplish the sensor node deployment (SND) phase.
% \subsubsection{Step SND-1} RC picks a unique $ID_{SN_{x}}$ and $PID_{SN_{x}}$ each of size 80 bits.
% Moreover, RC selects a random number $R_{x}$ and computes a temporary secret (TS) for $SN_{x}$ as $A_{e}$ $=$ $H(GK$ $\parallel$ $ R_{x}\parallel$ $ ID_{G})$, and  $TS_{SN_{x}}$ $=$ $A^{a}_{e}$ $\oplus$ $ A^{b}_{e}$, where $A^{a}_{e}$ and $ A^{b}_{e}$ are two chunks of $A_{e}$, each of size 80 bits.
% \subsubsection{Step SND-2} RC stores the credentials \{$ID_{SN_{x}}$, $PID_{SN_{x}}$, $TS_{SN_{x}}$\} in the  memory of $SN_{x}$ before its deployment.
% \subsection{Remote user registration phase}\label{RUR12}
% It is imperative for RC to register $RU_{y}$ before providing access to the 6LoWPAN  network resources. RC assigns different secret credentials and a list of $SN_{x}$ to $RU_{y}$. RC executes the following steps to perform the remote user registration (RUR) phase.
% \subsubsection{Step RUR-1} $RU_{y}$ selects a distinct identity $ID_{RU_{y}}$ and computes $HID_{y}$ $=$ $H(ID_{RU_{y}})$. Moreover, $RU_{y}$ contrives a registration message $ME^{r}_{1}:$ $\{HID_{y}\}$ and dispatches  $ME^{r}_{1}$ to RC via a protected channel.
% \subsubsection  {Step RUR-2} RC selects a distinct pseudonym $PID^{x}$ for $RU_{y}$ and calculates $A_{q}$ $=$ $H(GK$ $\parallel$ $ ID_{G})$, and $A_{x}$ $=$ $H(HID$ $\parallel$ $ ID_{G}$ $\parallel$ $ GK)$. RC determines a TS credential for $RU_{y}$ by dividing $A_{x}$ into two equal parts, namely, $A^{a}_{x}$ and $A^{b}_{x}$, each of size 80 bits, and computes $TS_{RU_{y}}$ $=$ $A^{a}_{x}$ $\oplus$ $A^{b}_{x}$. Moreover, RC computes the revocation parameter (ReP) as $B_{x}$ $=$ $A_{q}$ $\oplus$ $HID_{y}$ and $RP_{RU_{y}}$ $=$ $B^{a}_{x}$ $\oplus$ $B^{b}_{x}$, where $B^{a}_{x}$ and $B^{b}_{x}$ are two chunks of $B_{x}$. Besides, RC assigns a list of $SN_{x}$ to be accessed by $RU_{y}$. Furthermore, RC computes encryption key as $EK_{}$ $=~$($A_{q}$ $\parallel$ $ [A_{q}]^{32}$), where $[A_{q}]^{32}$ are the first 32 bits of $A_{q}$ (to make the size of $EK$ 192 bits). In addition, RC derives $CT_{RU_{y}}$ $=$ $E_{EK}$$\{ TS_{RU_{y}}$, $PID_{SN_{x}}$, $TS_{SN_{x}}$\} by  using AES-192, and stores a list of credentials \{$PID^{x}$, $RP_{RU_{y}}$, $CT_{RU_{y}}$\} in $GW$'s memory. Finally, RC fabricates a message $ME^{r}_{2}:$ $\{PID^{x}$, $TS_{RU_{y}}$, $PID_{SN_{x}}$\} and sends $ME^{r}_{2}$ to $RU_{y}$ securely.
% \subsubsection  {Step RUR-3} After procuring $ME^{r}_{2}$ from RC, $RU_{y}$ supplies its  $ID_{RU_{y}}$, password $PS_{RU_{y}}$ and $B_{RU_{y}}$ at the interface of smart device $SD_{y}$ and computes $(\beta_{k}$, $Rp)$ $=$ $Gen(B_{RU_{y}})$ by using fuzzy extractor ($FE$). $FE$ consist of two functions. The first one is $Gen(.)$, which is a probabilistic function that takes bio-metric information $B_{RU_{y}}$ of $RU_{y}$ and produces two output parameters, namely, secret bio-metric key $\beta_{k}$ and reproduction parameter $Rp$. The second function of $FE$ is $Rep(.)$, which is a deterministic function that takes $Rp$ and $B_{RU_{y}}$ to reproduce $\beta_{k}$. Moreover, $SD_{y}$ calculates $Z_{x}$ $=$ $H( PID^{x}$ $\parallel$ $ TS_{RU_{y}}$ $\parallel$ $ PID_{SN_{x}})$, $Z_{y}$ $=$ $H(ID_{RU_{y}}$ $\parallel$ $ PS_{RU_{y}}$ $\parallel$ $ \beta_{k})$, and encryption key  $EK_{y}=(Z_{y}\parallel[Z_{y}]^{32})$, where $[Z_{y}]^{32}$ are the first 32 bits of $Z_{y}$ to create $EK_{y}$ of size 192 bits. Furthermore, $SD_{y}$ calculates  $CT_{lo}$ $=$ $E_{EK_{y}}$ $\{$$PID^{x}$, $TS_{RU_{y}}$, $CT_{RU_{y}}$\} by using AES-192. In addition, $SD_{y}$ computes {authentication parameter as $Auth_{y}$ $=$} $H(ID_{RU_{y}}$ $\parallel$ $PS_{RU_{y}}$ $\parallel$ $\beta_{k}$ $\parallel$  $Z_{x}$).
% \subsubsection  {Step RUR-4} Finally, $SD_{y}$ stores the list of credentials \{$CT_{lo}$, $Auth_{y}$, $Rp$, $Gen(.)$, $Rep(.)$, $Et$\} in its memory and deletes all other parameters.
% \subsection{RU AKE phase}
% To access and communicate with the deployed 6LoWPAN based devices, it is necessary for $RU_{y}$ to register itself with RC. RC allocates a list of secret credentials and devices to  $RU_{y}$ at the time of registration. After authorizing $RU_{y}$'s legitimacy, RC allows $RU_{y}$ to access the specified devices deployed in the network. After getting authenticated by RC, $RU_{y}$ and $SN_{x}$ set up an SK for reliable and secure communication. The following steps elaborate RU AKE phase (RAP).
% \subsubsection{Step RAP-1}  $SD_{y}$ receives the secret credentials $PS_{RU_{y}}$, $ID_{RU_{y}}$, and $B_{RU_{y}}$, and computes $\beta_{k}$ $=$ $Rep(B_{RU_{y}},$ $Rp)$ and $Z_{y}$ $=$ $H(ID_{RU_{y}}$ $\parallel$ $ PS_{RU_{y}}$ $\parallel$ $ \beta_{k})$. In addition, $SD_{y}$ computes the decryption key $DK_{lo}$ as $DK_{lo}=(Z_{y}\parallel[Z_{y}]^{32})$, where $[Z_{y}]^{32}$ are the first 32 bits of $Z_{y}$ to make $DK_{lo}$ of size 192 bits. Moreover, $SD_{y}$ computes $PT_{lo}$ $=$ $D_{DK_{lo}}$ $\{ CT_{lo}\}$, where $CT_{lo}$ is the ciphertext stored in $SD_{y}$, and retrieves $PT_{lo}=$$\{ PID^{x}$, $TS_{RU_{y}}$, $PID_{SN_{x}}$\}. Furthermore, $SD_{y}$ calculates $Z^{lo}_{x}$ $=$ $H( PID^{x}$ $\parallel$ $ TS_{RU_{y}}$ $\parallel$ $ PID_{SN_{x}})$, and authentication parameter $Auth_{lo}$ $=$ $H(ID_{RU_{y}}$ $\parallel$ $PS_{RU_{y}}$ $\parallel$ $\beta_{k}$ $\parallel$  $Z_{x}$). Finally, $SD_{y}$ checks $Auth_{y}\stackrel{}{=} Auth_{lo}$ to perform local authentication. If the condition holds, $SD_{y}$ continues the AKE process.

% \subsubsection{Step RAP-2} After performing the local authentication, $SD_{y}$ chooses $T_{x}$ of size 32 bits, and $R_{1}$ of size 80 bits. $SD_{y}$ calculates $G_{1}= (R_{1}\parallel PID_{SN_{x}})\oplus H(TS_{RU_{y}}\parallel T_{x})$ and $Auth_{a1}=H(PID^{x}_{} \parallel PID_{SN_{x}} \parallel R_{1} \parallel TS_{RU_{y}})$. Furthermore, $SD_{y}$ contrives a message $ME_{a}:$ \{$T_{x}$,~$PID^{x}$,~ $G_{1}$,~ $Auth_{a1}\}$ and dispatches it to $GW$ via an open communication channel.
% \subsubsection{Step RAP-3} Upon procuring $ME_{a}$ from $SD_{y}$, $GW$ verifies the validity of timestamp by validating the condition $TD_{x}\ge|Tr-T_{x}|$, where $TD_{x}$ is maximum tolerable packet time delay, $Tr$ is  the receiving time of $ME_{a}$, and $T_{x}$ is fabrication time of $ME_{a}$. If $ME_{a}$ receives at the $GW$ within the maximum allowed time delay limit, $GW$ considers $ME_{a}$ to be a licit and fresh message and continues the AKE phase. $GW$ picks $PID^{x}$ from the received  $ME_{a}$ and looks up $PID^{x}$ in $GW$'s memory. If found, $GW$ extracts the list of credentials \{$PID^{x}$, $RP_{RU_{y}}$, $CT_{RU_{y}}$\} related to $PID^{x}$. In addition, $GW$  calculates  $DK$ as $M_{1}$ $=$ $H(GK$ $\parallel$ $ ID_{G})$  and $DK$ $=$ $(M_{1}$ $\parallel$ $[M_{1}]^{32})$. Moreover, $GW$ computes $PT_{1}$ $= $ $D_{DK}\{ CT_{RU_{y}}\}$ by using AES-192, and procures secret credentials $\{ TS_{RU_{y}}$, ($PID_{SN_{x}}$, $TS_{SN_{x}})$\} {from $PT_{1}$}. Furthermore, $GW$ obtains $R_{1}$ and $PID_{SN_{x}}$ by computing $ (R_{1}$ $\parallel$ $ PID_{SN_{x}})$ $=$ $G_{1}$ $\oplus$ $ H(TS_{RU_{y}}$ $ \parallel$ $ T_{x})$. To validate the authenticity of $ME_{a}$, $GW$ calculates $Auth_{a2}$ $=$ $H(PID^{x}_{} $ $\parallel$ $ PID_{SN_{x}}$ $   $ $\parallel$$ R_{1}$ $ \parallel$ $ TS_{RU_{y}})$ and verifies the condition $Auth_{a1}\stackrel{}{=} Auth_{a2}$. If the condition holds, $GW$ continues the execution of the AKE process. 
% \subsubsection{Step RAP-4} After validating the authenticity of $ME_{a}$, $GW$ picks a timestamp $T_{y}$ and random number $R_{2}$, and computes $W_{1}$ $=$ $H(R_{1}$ $\parallel$ $ TS_{RU_{y}}$ $\parallel$ $ PID^{x})$, where $W_{1}$ is obtained using hash of the parameters, including $R_{1}$, $TS_{RU_{y}}$, and $ PID^{x}$. $GW$ calculates the update parameter (UP)  as $UP$ $=$ $W^{a}_{1}$ $\oplus$ $ W^{b}_{1}$, where $W^{a}_{1}$ and $W^{b}_{1}$ are obtained by dividing {$W_{1}$} into two equal chunks of 80 bits each. Besides, $GW$ computes $PID^{x+1}$ $=$ $ UP$ $\oplus$ $ PID^{x}$ and stores both $PID^{x}$ and $PID^{x+1}$ in its memory to avoid the de-synchronization attack. Moreover, $GW$ calculates $W_{2}$ $=$ $H(TS_{SN_{x}}$ $\parallel$ $ PID_{SN_{x}}$ $ \parallel$ $ T_{y})$, $G_{2}$ $=$ $W_{1}$ $\oplus$ $ W_{2}$, $G_{3}$ $=$ $(R_{2}, R_{1} )$ $\oplus$ $ W_{2}$, and  $Auth_{a3}$ $=$ $H(W_{1}$ $ \parallel$ $ R_{2}$ $\parallel$ $ R_{1}$ $ \parallel$ $TS_{SN_{x}}$ $\parallel$ $PID_{SN_{x}}$  $ \parallel$ $ T_{y} )$. Finally, $GW$ creates a message $ME_{b}:$ \{ $T_{y}$,~$G_{2}$,~ $G_{3}$,~ $Auth_{a3}$\} and sends it to $SN_{x}$ via the public channel.
% \subsubsection{Step RAP-5} After procuring $ME_{b}$ from $GW$, $SN_{x}$ verifies the condition $TD_{x}\ge|Tr-T_{y}|$. If the condition holds, $SN_{x}$ computes $W_{3}$ $=$ $H(TS_{SN_{x}}$ $\parallel$ $ PID_{SN_{x}}$ $ \parallel$ $ T_{y})$,  $W_{1}$ $=G_{2}$ $\oplus$ $ W_{3}$, and $(R_{2}$ , $R_{1}$ )$=$$G_{3}$ $\oplus$ $ W_{3}$. Moreover, $SN_{x}$ calculates $Auth_{a4}$ $=$ $H(W_{1}$ $ \parallel$ $ R_{2}$ $\parallel$ $ R_{1}$ $ \parallel$ $TS_{SN_{x}}$ $\parallel$ $PID_{SN_{x}}$ $ \parallel$ $ T_{y} )$. Furthermore, $SN_{x}$  determines the integrity of $ME_{b}$  by validating the condition $Auth_{a3}\stackrel{}{=} Auth_{a4}$. If the condition holds, $SN_{x}$ picks a timestamp $T_{z}$ and a random number $R_{2}$, and computes  $G_{4}$ $=H(R_{1}$ $\parallel$ $ R_{2}$ $ \parallel$ $ R_{3})$ $\oplus$ $ W_{1}$. For securing communication with $RU_{y}$, $SN_{x}$ calculates $SK_{x}$ $=H(H(R_{1}$ $\parallel$ $ R_{2}$ $ \parallel$ $ R_{3})$ $\parallel$ $ W_{1}$ $\parallel$ $ T_{z}$ $\parallel$ $ PID_{SN_{x}})$. In addition, $SN_{x}$ computes $Auth_{a5}$ $=$ $H(H(R_{1}$ $\parallel$ $ R_{2}$ $ \parallel$ $ R_{3})$ $\parallel$ $ R_{1}$ $\parallel$ $ T_{z}$ $\parallel$ $ SK_{x})$. Finally, $SN_{x}$ calculates a message $ME_{c}:$ \{$T_{z}$,~$G_{4}$,~  $Auth_{a5}$\} and sends it to $RU_{y}$ via the public channel.
% \subsubsection{Step RAP-6} $RU_{y}$ considers the received $ME_{c}$ fresh if the condition $TD_{z}\ge|Tr-T_{z}|$ holds. If $ME_{c}$  is valid, $RU_{y}$ calculates $W_{4}$ $=$ $H(R_{1}$ $\parallel$ $  TS_{RU_{y}}$ $\parallel$ $ PID^{x})$, and  $H(R_{1}$ $\parallel$ $ R_{2} $ $\parallel$ $ R_{3})$ $=$ $G_{4}$ $\oplus $$~ W_{4}$.  For encrypted communication with $SN_{x}$, $RU_{y}$ computes $SK_{y}$ $=$ $H(H(R_{1}$ $\parallel$ $ R_{2}$ $ \parallel$ $ R_{3})$ $\parallel$ $ W_{4}$ $\parallel$ $ T_{z}$ $\parallel$ $ PID_{SN_{x}})$. Furthermore, $RU_{y}$ computes $Auth_{a6}$ $=H(H(R_{1}$ $\parallel$ $ R_{2}$ $ \parallel$ $ R_{3})$ $\parallel$ $ R_{1}$ $\parallel$ $ T_{z}$ $ \parallel$ $ SK_{y})$ and checks $Auth_{a5}\stackrel{}{=} Auth_{a6}$. If the equation holds, $RU_{y}$ considers $ME_{c}$ as a valid message. Finally, $RU_{y}$  computes $UP_{}=W^{a}_{4}\oplus W^{b}_{4}$ and updates  $PID^{x}$ by calculating $PID^{x+1}=PID^{x}\oplus UP_{1}$. $RU_{y}$ keeps both $PID^{x+1}$ and $PID^{x}$ in its memory to ensure resistance against  de-synchronization attack. The user AKE phase of SRUA-IoT is summarized in Fig. \ref{fig:SRUA-IoT}.


% \begin{figure}[H]
% 	\centering
% % 	\scalebox{0.5}{\begin{tabular}{|m{8cm} m{8.5cm} m{8.5cm}|}
% % 			\toprule \hline
% % 			%\toprule \toprule
% % 			\textbf{	Remote User} $RU_{y}$/$SD_{y}$ &  \textbf{Gateway/Registration Center} $GW/RC$&  \textbf{Sensor Node} $SN_{x}$ \\ \hline
% % 			\{$CT_{lo}$, $Auth_{y}$, $Rp$, $Gen(.)$, $Rep(.)$, $Et$\} &\{ $PID^{x+1}$, $PID^{x}$, $RP_{RU_{y}}$, $CT_{RU_{y}}$\}& \{$PID_{SN_{x}}$, $TS_{SN_{x}}$ \} \\ \hline
% % 			\vspace{-35mm} \textbf{Step  RAP-1} \newline inputs $PS_{RU_{y}}$ and $ID_{RU_{y}}$,\newline imprints bio-metric $B_{RU_{y}}$,\newline calculates $\beta_{k}=Rep(B_{RU_{y}}, Rp)$,\newline $Z_{y}$ $=$ $H(ID_{RU_{y}}$ $\parallel$ $ PS_{RU_{y}}$ $\parallel$ $ \beta_{k})$,\newline $DK_{lo}=(Z_{y}\parallel[Z_{y}]^{32})$, $PT_{lo}=D_{DK_{lo}}\{ CT_{lo}\}$, \newline retrieves   $PT_{lo}=$$\{ PID^{x}$, $PID_{SN_{x}}$, $TS_{RU_{y}}$\},\newline computes $Z^{lo}_{x}$ $=$ $H( PID^{x}$ $\parallel$ $ TS_{RU_{y}}$ $\parallel$ $ PID_{SN_{x}})$,\newline $Auth_{lo}$ $=$ $H(ID_{RU_{y}}$ $\parallel$ $PS_{RU_{y}}$ $\parallel$ $\beta_{k}$ $\parallel$  $Z^{lo}_{x}$), \newline checks $Auth_{y}\stackrel{}{=} Auth_{lo}$, if so,\newline  \textbf{Step  RAP-2} \newline  picks $T_{x}$, $R_{1}$, computes  \newline $G_{1}= (R_{1}\parallel PID_{SN_{x}})\oplus H(TS_{RU_{y}}\parallel T_{x})$, \newline $Auth_{a1}=H(PID^{x}_{} \parallel PID_{SN_{x}}      \parallel R_{1} \parallel TS_{RU_{y}})$, \newline \newline $ \xrightarrow[\text{ ($RU_{y} \rightarrow GW$)}]{ ME_{a}: \{ T_{x},~PID^{x},~ G_{1},~ Auth_{a1}\} } $.
			
% % 			&\vspace{-10mm}\textbf{Step  RAP-3} \newline  verifies if $TD_{x}\ge|Tr-T_{x}|$, If so, \newline picks $PID^{x}$ from received  $ME_{a}$, \newline searches $PID^{x}$ in $GW$'s database, if found, \newline retrieves \{ $PID^{x}$, $RP_{RU_{y}}$, $CT_{RU_{y}}$\}, \newline computes $PT_{1}= D_{DK}\{ CT_{RU_{y}}\}$, \newline retrieves  $\{ TS_{RU_{y}}$, ($PID_{SN_{x}}$, $TS_{SN_{x}})$\}, \newline $ (R_{1}\parallel PID_{SN_{x}})=G_{1}\oplus H(TS_{RU_{y}} \parallel T_{x})$, \newline $Auth_{a2}=H(PID^{x}_{} \parallel PID_{SN_{x}}      \parallel R_{1} \parallel TS_{RU_{y}})$,\newline validates if $Auth_{a1}\stackrel{}{=} Auth_{a2}$, if holds, \newline\textbf{Step  RAP-4} \newline  picks $T_{y}$, $R_{2}$, calculates\newline $W_{1}=H(R_{1}\parallel TS_{RU_{y}}\parallel PID^{x})$, $UP=W^{a}_{1}\oplus W^{b}_{1}$, \newline $PID^{x+1}= UP\oplus PID^{x}$, \newline $W_{2}=H(TS_{SN_{x}}\parallel PID_{SN_{x}} \parallel T_{y})$,  $G_{2}=W_{1}\oplus W_{2}$, \newline$G_{3}=(R_{2}, R_{1} )\oplus W_{2}$, \newline $Auth_{a3}=H(W_{1} \parallel R_{2}\parallel R_{1} \parallel TS_{SN_{x}}\parallel PID_{SN_{x}}\parallel T_{y} )$, \newline \newline $ \xrightarrow[\text{ ($GW \rightarrow SN_{x}$)}]{ ME_{b}: \{ T_{y},~G_{2},~ G_{3},~ Auth_{a3}\} } $.  & \vspace{60mm} \textbf{Step  RAP-5} \newline verifies $TD_{x}\ge|Tr-T_{y}|$, if holds, \newline $W_{3}=H(TS_{SN_{x}}\parallel PID_{SN_{x}} \parallel T_{y})$, \newline $W_{1}=G_{2}\oplus W_{3}$, $(R_{2}, R_{1} )=G_{3}\oplus W_{3}$, \newline $Auth_{a4}=H(W_{1} \parallel R_{2}\parallel R_{1} \parallel TS_{SN_{x}}\parallel PID_{SN_{x}} \parallel T_{y} )$, \newline validates $Auth_{a3}\stackrel{}{=} Auth_{a4}$, if holds, \newline picks $T_{z}$, $R_{3}$, computes \newline $G_{4}=H(R_{1}\parallel R_{2} \parallel R_{3})\oplus W_{1}$,  \newline $SK_{x}=H(H(R_{1}\parallel R_{2} \parallel R_{3})\parallel W_{1}\parallel T_{z}\parallel PID_{SN_{x}})$,\newline $Auth_{a5}=H(H(R_{1}\parallel R_{2} \parallel R_{3})\parallel R_{1}\parallel T_{z}\parallel SK_{x})$, \newline \newline $ \xleftarrow[\text{ ($RU_{y} \leftarrow SN_{x}$)}]{ ME_{c}: \{ T_{z},~G_{4},~  Auth_{a5}\} } $. \\ 
% % 			\vspace{-15mm} \textbf{Step  RAP-6} \newline verifies $TD_{x}\ge|Tr-T_{z}|$, if holds, \newline computes $W_{4}=H(R_{1}\parallel TS_{RU_{y}}\parallel PID^{x})$, \newline  $H(R_{1}\parallel R_{2} \parallel R_{3})=G_{4}\oplus W_{4}$,\newline $SK_{y}=H(H(R_{1}\parallel R_{2} \parallel R_{3})\parallel W_{4}\parallel T_{z}\parallel PID_{SN_{x}})$, \newline $Auth_{a6}=H(H(R_{1}\parallel R_{2} \parallel R_{3})\parallel R_{1}\parallel T_{z} \parallel SK_{y})$,\newline checks $Auth_{a5}\stackrel{}{=} Auth_{a6}$, if holds,\newline $UP_{1}=W^{a}_{4}\oplus W^{b}_{4}$, $PID^{x+1}=PID^{x}\oplus UP_{1}$.&&  \\ \hline
% % 			\multicolumn{3}{|c|}{$SK_{y}(=SK_{x})=H(H(R_{1}\parallel R_{2} \parallel R_{3})\parallel H(R_{1}\parallel TS_{RU_{y}}\parallel PID^{x})\parallel T_{z} \parallel PID_{SN_{x}})$ } \\	
			
			
% % 			\toprule \toprule %\multicolumn{2}{|c|}{\textbf{Grade 11}} \\[2ex]
% % 	\end{tabular}}

% % 		\includegraphics[width=8cm,height=.0cm]{Fig 1.tiff}

% 	\caption{{The user AKE phase of SRUA-IoT.}}
% 	\label{fig:SRUA-IoT}
% \end{figure}

% \subsection{Password change phase}
% In SRUA-IoT, an authorized user $RU_{y}$ can change its password and update bio-metric information without involving RC. $RU_{y}$ needs to perform the following steps to execute the password change phase (PCP).
% \subsubsection{Step PCP-1} $RU_{y}$ provides its secret credentials, namely,  $ID^{o}_{RU_{y}}$, $PS^{o}_{RU_{y}}$, and   $B^{o}_{RU_{y}}$ as inputs at the interface of $SD_{y}$. After procuring the inputs,  $SD_{y}$ computes the bio-metric key $\beta^{o}_{k}$ $=$ $Rep(B^{o}_{RU_{y}}$, $Rp^{o})$. Moreover, $SD_{y}$ derives the decryption Key $DK^{o}_{lo}$ by computing  $Z^{o}_{y}$ $=$ $H(ID^{o}_{RU_{y}}$ $\parallel$ $ PS^{o}_{RU_{y}}$ $\parallel$ $ \beta^{o}_{k})$, and $DK^{o}_{lo}$ $=$ $(Z^{o}_{y}$ $\parallel$ $[Z^{o}_{y}]^{32})$. By using AES-192 decryption algorithm, $SD_{y}$ calculates $PT^{o}_{lo}$ $=$ $D_{DK^{o}_{lo}}$ $\{ CT^{o}_{lo}\}$, where $PT^{o}_{lo}=$$\{ PID^{x}$, $TS_{RU_{y}}$, $PID_{SN_{x}}$\}. Furthermore, $SD_{y}$ computes $Z^{o}_{x}$ $=$ $H( PID^{x}$ $\parallel$ $ TS_{RU_{y}}$ $\parallel$ $ PID_{SN_{x}})$, $Auth^{o}_{lo}$ $=$ $H(ID^{o}_{RU_{y}}$ $\parallel$ $PS^{o}_{RU_{y}}$ $\parallel$ $\beta^{o}_{k}$ $\parallel$  $Z^{o}_{x}$),  and verifies if the condition $Auth^{o}_{lo}\stackrel{}{=} Auth_{lo}$ holds. If it holds, $SD_{y}$ notifies $RU_{y}$ to enter a new password $PS^{n}_{RU_{y}}$ and update bio-metric information $B^{n}_{RU_{y}}$. Otherwise, $SD_{y}$ halts the AKE process.
% \subsubsection{Step PCP-2} Upon procuring  $PS^{n}_{RU_{y}}$ and $B^{n}_{RU_{y}}$ from $RU_{y}$, $SD_{y}$ determines a new bio-metric key $\beta^{n}$ by computing $(\beta^{n}$, $Rp^{n})$ $=$ $Gen(B^{n}_{RU_{y}})$. Moreover, $SD_{y}$  computes the encryption key $EK^{n}_{lo}$ as $Z^{n}_{y}$ $=$ $H(ID^{o}_{RU_{y}}$ $\parallel$ $ PS^{n}_{RU_{y}}$ $\parallel$ $ \beta^{n}_{k})$, $EK^{n}_{lo}$ $=$ $(Z^{n}_{y}$ $\parallel$ $[Z^{n}_{y}]^{32})$, where $[Z^{n}_{y}]^{32}$ are the first 32 bits of $Z^{n}_{y}$.  Furthermore,  $SD_{y}$ calculates new plaintext $PT^{n}_{lo}$ by deriving $PT^{n}_{lo}=$ $\{ PID^{x}$, $TS_{RU_{y}}$, $PID_{SN_{x}}$\}.  In addition, $SD_{y}$ 
% computes  $Z^{n}_{x}$ $=$ $H( PID^{x}$ $\parallel$ $ TS_{RU_{y}}$ $\parallel$ $ PID_{SN_{x}})$, and $Auth^{n}_{lo}$ $=$ $H(ID^{o}_{RU_{y}}$ $\parallel$ $PS^{n}_{RU_{y}}$ $\parallel$ $\beta^{n}_{k}$ $\parallel$  $Z^{n}_{x}$). Finally, by utilizing AES-192 encryption algorithm, $SD_{y}$ calculates $CT^{n}_{lo}$ $=E_{EK^{n}_{lo}}$ $\{ PT^{n}_{lo}\}$, replaces \{$CT^{n}_{lo}$, $Auth^{n}_{y}$, $Rp^{n}$, $Gen(.)$, $Rep(.)$, $Et^{n}$\} with \{$CT^{}_{lo}$, $Auth_{y}$, $Rp$, $Gen(.)$, $Rep(.)$, $Et$\} in  $SD_{y}$'s memory, and deletes all other credentials in its memory.  Fig. \ref{pcp} summarizes PCP.

% \begin{figure}[H]
% 	\centering
% % 	\scalebox{0.7}{\begin{tabular}{|m{7cm} m{7.2cm}|}
% % 			%\hline \hline
% % 			\toprule \toprule
% % 			\textbf{	Remote User} $RU_{y}$ &  \textbf{Smart-Device} $SD_{y}$ \\ \hline \hline
% % 			inserts $ID^{o}_{RU_{y}}$, $PS^{o}_{RU_{y}}$, \newline bio-metric  $B^{o}_{RU_{y}}$, \newline $\xrightarrow[\text{}]{  \{~ ID^{o}_{RU_{y}},~ PS^{o}_{RU_{y}}, ~B^{o}_{RU_{y}}\}  }$. & \\ 
% % 			& \vspace{-15mm}computes $\beta^{o}_{k}=Rep(B^{o}_{RU_{y}}, Rp^{o})$, \newline $Z^{o}_{y}$ $=$ $H(ID^{o}_{RU_{y}}$ $\parallel$ $ PS^{o}_{RU_{y}}$ $\parallel$ $ \beta^{o}_{k})$, \newline $DK^{o}_{lo}$ $=$ $(Z^{o}_{y}$ $\parallel$ $[Z^{o}_{y}]^{32})$,\newline $PT^{o}_{lo}=D_{DK^{o}_{lo}}\{ CT^{o}_{lo}\}$, \newline $PT^{o}_{lo}=$$\{ PID^{x}$, $TS_{RU_{y}}$, $PID_{SN_{x}}$\}, \newline $Z^{o}_{x}$ $=$ $H( PID^{x}$ $\parallel$ $ TS_{RU_{y}}$ $\parallel$ $ PID_{SN_{x}})$, \newline $Auth^{o}_{lo}$ $=$ $H(ID^{o}_{RU_{y}}$ $\parallel$ $PS^{o}_{RU_{y}}$ $\parallel$ $\beta^{o}_{k}$ $\parallel$  $Z^{o}_{x}$),\newline checks $Auth^{o}_{lo}\stackrel{}{=} Auth_{lo}$, if so, \newline  notifies $RU_{y}$ to insert new $PS^{n}_{RU_{y}}$\newline and latest $B^{n}_{RU_{y}}$.\newline\\
% % 			inserts $PS^{n}_{RU_{y}}$, $B^{n}_{RU_{y}}$, \newline   $\xrightarrow[\text{}]{  \{~ PS^{n}_{RU_{y}}, ~B^{n}_{RU_{y}} \} }$. & \\
% % 			&  \vspace{-15mm} computes $(\beta^{n}, Rp^{n})=Gen(B^{n}_{RU_{y}})$, \newline $Z^{n}_{y}$ $=$ $H(ID^{o}_{RU_{y}}$ $\parallel$ $ PS^{n}_{RU_{y}}$ $\parallel$ $ \beta^{n}_{k})$, \newline $EK^{n}_{lo}$ $=$ $(Z^{n}_{y}$ $\parallel$ $[Z^{n}_{y}]^{32})$,  \newline $PT^{n}_{lo}=$$\{ PID^{x}$, $TS_{RU_{y}}$, $PID_{SN_{x}}$\}, \newline $Z^{n}_{x}$ $=$ $H( PID^{x}$ $\parallel$ $ TS_{RU_{y}}$ $\parallel$ $ PID_{SN_{x}})$, \newline $Auth^{n}_{lo}$ $=$ $H(ID^{o}_{RU_{y}}$ $\parallel$ $PS^{n}_{RU_{y}}$ $\parallel$ $\beta^{n}_{k}$ $\parallel$  $Z^{n}_{x}$),   \newline $CT^{n}_{lo}=E_{EK^{n}_{lo}}\{ PT^{n}_{lo}\}$. \\ 
% % 			\vspace{-15mm}	replaces \{$CT^{n}_{lo}$, $Auth^{n}_{y}$, $Rp^{n}$, $Gen(.)$, $Rep(.)$, $Et^{n}$\}\newline with \{$CT^{}_{lo}$, $Auth_{y}$, $Rp$, $Gen(.)$, $Rep(.)$, $Et$\} in  $SD_{y}$'s memory and deletes all other credentials in its memory.  & \\
% % 			\toprule \toprule
% % 	\end{tabular}}
	
% % 			\includegraphics[width=8cm,height=.5cm]{Fig 2.tiff}

% 	\caption{Password change phase.}
% 	\label{pcp}
% \end{figure}

% \subsection{Revocation phase}
% If a legitimate $RU_{y}$ loses its $SD_{y}$, $RU_{y}$ can obtain a new $SD^{new}_{y}$ from RC. To obtain $SD^{new}_{y}$, it is necessary for $RU_{y}$ to remember its $ID_{RU_{y}}$. For proper RP, it is necessary to remove the previous data from $GW$'s memory. Most AKE schemes do not delete the old data from the memory of $GW$ or server. $RU_{y}$ needs to perform the succeeding steps to procure a new SC.
% \subsubsection{Step RP-1} Upon getting $ID_{RU_{y}}$, $SD_{y}$ computes $HID_{y}$ $=$ $H(ID_{RU_{y}})$, constructs a message
% $ME^{rov}_{1}:\{ HID_{y}\}$, and forwards  $ME^{rov}_{1}$ to RC. After getting $ME^{rov}_{1}$ from $RU_{y}$, RC computes $B_{}$ $=$ $H(GK\parallel ID_{G})$ $\oplus$ $HID^{}_{y}$, 
% $RP^{}_{RU_{y}}$ $=$ $B^{a}_{}$ $\oplus$ $B^{b}_{}$, and verifies if $RP^{}_{RU_{y}}$ exists in its memory. If found, RC removes  $RP^{}_{RU_{y}}$ related record  and informs $RU_{y}$ for new registration by sending $ME^{rov}_{1}:\{registration~~ request\}$ to $RU_{y}$.
% \subsubsection{Step RP-2} Upon getting the new registration request, $RU_{y}$ picks new $PS^{new}_{RU_{y}}$, $ID^{new}_{RU_{y}}$, and computes $HID^{new}=H(ID^{new}_{RU_{y}})$. $SD_{y}$ constructs a message $ME^{rov}_{3}:\{ HID^{new}_{y}\}$ and sends to RC.
% \subsubsection{Step RP-3} RC picks a new pseudonym $PID^{x}_{new}$ for $RU_{y}$ and computes $A^{new}_{q}$ $=$ $H(GK$ $\parallel$ $ ID_{G})$. To issue a new  $SD^{new}_{y}$ to  $RU_{y}$, RC computes the same computation as accomplished in Step  RUR-2 of Section \ref{RUR12}. Finally, RC contrives a message $ ME^{rov}_{4}$ $:\{PID^{x}_{new}$, $TS^{new}_{RU_{y}}$, $PID^{new}_{SN_{x}} \}$ and sends $ ME^{rov}_{4}$ to $RU_{y}$ via a reliable channel.
% \subsubsection{Step RP-4}After receiving  $ME^{rov}_{4}$ from RC, $SD_{y}$  executes the same computation as excuted in Step RUR-3 of Section \ref{RUR12}
% Finally, $SD_{y}$ stores a new list of parameters \{$CT^{new}$, $Auth^{new}_{y}$, $Gen(.)$, $Rep(.)$, $Rp^{new}$, $Et^{new}$\} in  $SD_{y}$'s memory. Moreover, RC stores a list of credentials \{$PID^{x}_{new}$, $RP^{new}_{RU_{y}}$, $CT^{new}_{RU_{y}}$\} in $GW$'s memory. The revocation phase is summarized in Fig. \ref{fig:ARUArovp}. 
% %%%%%%%%%%%%%%%%%%%%%%%%%%%%%%%%%%%%%%%%%%%%%%%%%%%%%%%%%%%%%%%%%%%%%%%%%%%%%%%%%%%%%
% \begin{figure}[H]
% 	\centering
	
% % 	\scalebox{.7}[.71]{	\begin{tabular}{|m{7.5cm} m{7cm}|}
% % 			%\hline \hline
% % 			\toprule \toprule
% % 			\textbf{Remote User} $RU_{y}$ & \textbf{ Registration Center}\\ \hline \hline
% % 			\vspace{2mm} inputs  $ID_{RU_{y}}$,\newline  computes $HID_{y}$ $=$ $H(ID_{RU_{y}})$,
% % 			\newline $\xrightarrow[ RU_{y}\rightarrow RC]{  ME^{rov}_{1}:\{ HID_{y} \} } $  & \\ 
% % 			& \vspace{-15mm} 
% % 			computes $B_{}$ $=$ $H(GK\parallel ID_{G})$ $\oplus$ $HID^{}_{y}$, \newline
% % 			$RP^{}_{RU_{y}}$ $=$ $B^{a}_{}$ $\oplus$ $B^{b}_{}$,\newline
% % 			verifies if $RP^{}_{RU_{y}}$ found in database, if so,\newline removes  $RP^{}_{RU_{y}}$'s related record  and informs $RU_{y}$ for new registration,\newline \newline $\xleftarrow[ RC\rightarrow RU_{y}]{ ME^{rov}_{1}:\{registration~~ request\}}$.\\
			
% % 			\vspace{-25mm} picks new $PS^{new}_{RU_{y}}$, $ID^{new}_{RU_{y}}$ \newline computes $HID^{new}=H(ID^{new}_{RU_{y}})$,
% % 			\newline $\xrightarrow[RU_{y}\rightarrow RC]{ME^{rov}_{3}:\{HID^{new}_{y}\}} $ & \vspace{1mm}picks $PID^{x}_{new}$,\newline performs the same computation as performed in \textbf{Step  RUR-2} of Section \ref{RUR12}, \newline \newline $\xleftarrow[ RC\rightarrow RU_{y}]{ME^{rov}_{4}:\{PID^{x}_{new}, TS^{new}_{RU_{y}}, PID^{new}_{SN_{x}}\}}$. \\
% % 			\vspace{-10mm} imprints bio-metric $B^{new}_{RU_{y}}$, \newline $RU_{y}$ performs the same computation as in \textbf{Step  RUR-2} of Section \ref{RUR12},   	
% % 			%			  $(\beta^{new}_{k}, Rp^{new})=Gen(B^{new}_{RU_{y}})$, \newline $Z^{new}_{x}$ $=$ $H( PID^{x}_{new}$ $\parallel$ $ TS^{new}_{RU_{y}}$ $\parallel$ $ PID^{new}_{SN_{x}})$, \newline $Z^{new}_{y}$ $=$ $H(ID^{new}_{RU_{y}}$ $\parallel$ $ PS^{new}_{RU_{Y}}$ $\parallel$ $ \beta^{new}_{k})$,\newline   $CT^{new}_{lo}$ $=$ $E_{EK^{new}_{y}}$ $\{$ $TS^{new}_{RU_{y}}$, $PID^{new}_{x}$, $TS^{new}_{SN_{x}}$\}, \newline $Auth^{new}_{y}$ $=$ $H(ID^{new}_{RU_{y}}$ $\parallel$ $PS^{new}_{RU_{y}}$ $\parallel$ $\beta^{new}_{k}$ $\parallel$  $Z^{new}_{x}$),
% % 			\newline stores  \{$CT^{new}$, $Auth^{new}_{y}$, $Gen(.)$, $Rep(.)$, $Rp^{new}$, $Et^{new}$\} in  $SD_{y}$'s memory.  
% % 			& stores  \{$PID^{x}_{new}$, $RP^{new}_{RU_{y}}$, $CT^{new}_{RU_{y}}$\} in $GW$'s memory. \\
% % 			\toprule \toprule
% % 	\end{tabular}}
% % 		\includegraphics[width=8cm,height=.5cm]{Fig 3.tiff}

% 	\caption{Revocation phase.}
% 	\label{fig:ARUArovp}
% \end{figure}	
% \subsection{ New SN deployment phase}
% RC can  deploy a new SN (NSN) by performing the following steps.
% \subsubsection  {Step NSN-1} RC picks a distinct $ID^{n}_{SN_{x}}$ and $PID^{n}_{SN_{x}}$ for NSN $SN^{n}_{x}$. In addition, RC picks $R^{n}_{x}$ and computes a new temporary secret $TS^{n}_{SN_{x}}$ for $SN^{n}_{x}$ by calculating $A^{n}_{e}$ $=$ $H(GK$ $\parallel$ $ R^{n}_{x}\parallel$ $ ID_{G})$, and  $TS^{n}_{SN_{x}}$ $=$ $A^{n-a}_{e}$ $\oplus$ $ A^{n-b}_{e}$, where $A^{n-a}_{e}$ and $ A^{n-b}_{e}$ are two chunks of $A^{n}_{e}$, each of size 80 bits.
% \subsubsection  {Step NSN-2} Finally, RC stores the credentials \{$ID^{n}_{SN_{x}}$, $PID^{n}_{SN_{x}}$, $TS^{n}_{SN_{x}}$\} in $SN^{n}_{x}$'s memory before its deployment.

% \section{Security Analysis}\label{SA}
% In this section informal security analysis of SRUA-IoT is carried out to shows its resistance against various security attacks. The security of SK is validated by utilizing the well-known ROM. Scyther based security analysis is performed to validate SRUA-IoT's resistance against replay and MITM attacks.
% \subsection{Informal security analysis}
% This subsection illustrates that the proposed scheme is protected against various attacks, namely, replay, MITM, UI, offline PG, PI, and impersonation attacks.  
% \begin{prop} SRUA-IoT is resistant to replay attack.
% \end{prop}
% \begin{proof} There are three messages exchanged during the execution of the AKE phase, namely,
% 	$ME_{a}:$ \{$T_{x}$,~$PID^{x}$,~ $G_{1}$,~ $Auth_{a1}\}$, $ME_{b}:$ \{$T_{y}$,~$G_{2}$,~ $G_{3}$,~ $Auth_{a3}$\}, and $ME_{c}:$ \{$T_{z}$,~$G_{4}$,~$Auth_{a5}$\}. {These messages are constructed by incorporating latest timestamps $T_{x}$, $T_{y}$, and $T_{z}$}. The freshness of each timestamp is verified by validating the conditions  $TD_{x}\ge|Tr-T_{x}|$, $TD_{x}\ge|Tr-T_{y}|$, and  $TD_{x}\ge|Tr-T_{z}|$ for each message $ME_{a}$, $ME_{b}$, and $ME_{c}$, respectively. If these conditions do not hold, $GW$, $SN_{x}$, and $RU_{y}$ will detect the replay attack and the receiving network entity will discard the received message. Therefore, SRUA-IoT is resistant to replay attack.
% \end{proof}
% \begin{prop} SRUA-IoT is protected against DoS attack.
% \end{prop}
% \begin{proof} In SRUA-IoT, $RU_{y}$ uses its secret credentials to pass the local authentication, for which $SD_{y}$ needs to calculate $Auth_{lo}$ $=$ $H(ID_{RU_{y}}$ $\parallel$ $PS_{RU_{y}}$ $\parallel$ $\beta_{k}$ $\parallel$  $Z_{x}$) and check the condition $Auth_{y}\stackrel{}{=} Auth_{lo}$. Local verification will be successful if the condition holds. After local verification, $SD_{y}$ sends the AKE request to $GW$. Otherwise, $SD_{y}$ terminates the AKE process and prevents $RU_{y}$ from sending a large number of AKE requests to $GW$. Hence, SRUA-IoT is protected against DoS attack.
% \end{proof}

% \begin{prop} SRUA-IoT ensures untraceability and anonymity of $RU_{y}$.
% \end{prop}
% \begin{proof} In SRUA-IoT,  during the registration and the AKE phase, only pseudo identities are used, which do not provide any information about $ID_{RU_{y}}$. For each new AKE session, $RU_{y}$ utilizes the updated $PID^{x+1}$, and fresh random numbers $R_{1}$, $R_{2}$, and $R_{3}$. During the AKE process, the communicated messages are different for each session. Therefore, $\mathcal{A}$ cannot correlate the captured message from two different AKE sessions. Thus, SRUA-IoT renders the anonymity and untraceability of $RU_{x}$ and $SN_{x}$.
% \end{proof}

% \begin{prop} SRUA-IoT is protected against MITM attack.
% \end{prop}
% \begin{proof} In SRUA-IoT, there are three messages exchanged, i.e., $ME_{a}$, $ME_{b}$, and $ME_{c}$. Let $\mathcal{A}$ captures the the message $ME_{a}:$ \{$T_{x}$,$PID^{x}$, $G_{1}$, $Auth_{a1}\}$, which is transmitted by $RU_{y}$, and tries to update the message content by selecting a random number $R^{a}_{1}$ and timestamp $T^{a}_{x}$. For this, $\mathcal{A}$ needs to compute $G^{a}_{1}$ and $Auth^{a}_{a1}$ to pretend that $ME^{a}_{a}$ is from a legitimate $RU_{y}$. However, $\mathcal{A}$ cannot compute valid $G^{}_{1}$ and $Auth^{}_{a1}$ without knowing the secret credentials, namely, $TS_{RU_{y}}$, and $PIS_{SN_{x}}$, which are known only to $RU_{y}$. We can illustrate the same conditions for $ME_{b}$, and $ME_{c}$. Hence, SRUA-IoT is protected against MITM attack.
% \end{proof}
% \begin{prop} SRUA-IoT is immune to offline PG and SSC attacks.
% \end{prop}
% \begin{proof} In this case, $\mathcal{A}$ can execute various attacks by procuring sensitive information stored on the stolen/lost smart card or device. Let $\mathcal{A}$ obtains lost/stolen $SD_{y}$ of $RU_{y}$ and, by using power analysis attack, can procure the information, such as \{$CT_{lo}$, $Auth_{y}$, $Rp$, $Gen(.)$, $Rep(.)$, $Et$\} stored in the memory of $SD_{y}$. From the obtained information, $\mathcal{A}$ cannot retrieve  secret credentials, which are used during the AKE process. Therefore,  SRUA-IoT is protected against SSC attack. To update the password of $RU_{y}$, $\mathcal{A}$ picks a random identity, password and bio-metric information to compute $\beta^{a}_{k}$ $=$ $Rep(B^{a}_{RU_{y}}$, $Rp)$, $Z^{a}_{y}$ $=$ $H(ID^{a}_{RU_{y}}$ $\parallel$ $ PS^{a}_{RU_{y}}$ $\parallel$ $ \beta^{a}_{k})$, $DK^{a}_{lo}=(Z^{a}{y}\parallel[Z^{a}_{y}]^{32})$, and $PT^{a}_{lo}=D_{DK^{a}_{lo}}\{ CT_{lo}\}$,  retrieve   $PT^{a}_{lo}=$$\{ PID^{x}$, $PID^{a}_{SN_{x}}$, $TS^{a}_{RU_{y}}$\}, calculate $Z^{a}_{x}$ $=$ $H( PID^{x}$ $\parallel$ $ TS^{a}_{RU_{y}}$ $\parallel$ $ PID^{a}_{SN_{x}})$, $Auth_{a}$ $=$ $H(ID^{a}_{RU_{y}}$ $\parallel$ $PS^{a}_{RU_{y}}$ $\parallel$ $\beta^{a}_{k}$ $\parallel$  $Z^{a}_{x}$), and check $Auth^{a}_{y}\stackrel{}{=} Auth_{lo}$. However, without knowing the secret credentials of $RU_{y}$, such as $ID_{RU_{y}}$, $PS_{RU_{y}}$, and $B_{RU_{y}}$, it is not possible for $\mathcal{A}$ to perform valid commutation as mentioned above. Therefore, SRUA-IoT is immune to offline PG attack.
% \end{proof}
% \begin{prop} SRUA-IoT is secure against impersonation attack.
% \end{prop}
% \begin{proof} SRUA-IoT considers the following three types of impersonation attacks.
% 	\begin{enumerate}
% 		\item UI attack: Let $\mathcal{A}$ tries to generate an AKE request message $ME^{a}_{a}:$ \{$T^{a}_{x}$,$PID^{x}$, $G^{a}_{1}$, $A^{a}uth_{a1}\}$ by selecting $T^{a}_{x}$, and $R_{1}$. However, to send an AKE request to RC, $\mathcal{A}$ needs to known both the secret credentials, i.e., $TS_{RU_{y}}$ and $PID_{SN_{x}}$, which are known only to $RU_{y}$. Moreover, $TS_{RU_{y}}$ and $PID_{SN_{x}}$ are stored in $SD_{y}$'s memory in the encrypted form. Therefore, SRUA-IoT is secure against UI attack.
		
% 		\item RC impersonation attack: In this case, $\mathcal{A}$ picks $R^{a}_{2}$, $T^{a}_{y}$, and contrives a message $ME^{a}_{b}:$ \{$T^{a}_{y}$,$G^{a}_{2}$, $G^{a}_{3}$, $Auth^{a}_{a3}$\} to pretend that this messages is from a legitimate RC. However, to generate  $ME^{a}_{b}$, $\mathcal{A}$ needs to know the secret parameters, such as $TS_{SN_{x}}$ and $PID_{SN_{x}}$, which are stored in encrypted form. Therefore, without knowing these parameters, $\mathcal{A}$ cannot fabricate a false massage to make $SN_{x}$ believe that the message is created by a legal RC. Hence, SRUA-IoT is secure against RC impersonation attack. 
		
% 		\item $SN_{x}$ impersonation attack: $\mathcal{A}$ can generate a fake message $ME^{a}_{c}:$ \{$T^{a}_{z}$,$G^{a}_{4}$,  $Auth^{a}_{a5}$\} and send it to $RU_{y}$ to make $RU_{y}$ believe that the message is from a legal $SN_{x}$. However, to generate a valid $ME^{}_{c}$, $\mathcal{A}$ needs to know $W_{1}$, $R_{1}$, $R_{2}$, $R_{3}$, and $TS_{SN_{x}}$. Without the knowledge of these secret credentials, it is impractical for $\mathcal{A}$ to create a licit message $ME^{}_{c}$. Hence, SRUA-IoT is secure against $SN_{x}$ impersonation attack.
% \end{enumerate} \end{proof}
% \begin{prop} SRUA-IoT is resilient against $SN_{x}$ capture attack. 
	
% \end{prop}
% \begin{proof} In 6LoWPANs, $SN_{x}$ are deployed in unattended environment. $\mathcal{A}$ can capture an $SN_{x}$ and can procure the sensitive information stored in the memory of $SN_{x}$. Since all the deployed $SN_{x}$ contain distinct secret information, therefore, by capturing an $SN_{x}$ $\mathcal{A}$ cannot breach the security of the entire 6LoWPAN. Hence, SRUA-IoT is resilient against $SN_{x}$ capture attack.
% \end{proof}
% \begin{prop} SRUA-IoT is immune to de-synchronization attack.
% \end{prop}

% \begin{proof} If the network entities {are updating pseudonyms during the execution of the AKE process, $\mathcal{A}$ can establish de-synchronization attack by dropping the captured message}. In SRUA-IoT, $GW$ and $RU_{y}$ update $PID^{x}$ to $PID^{x+1}$ to accomplish anonymous communication. However, to avoid the de-synchronization attack, both $GW$ and $RU_{y}$ keep $PID^{x}$ and $PID^{x+1}$ in their {memory}. If $\mathcal{A}$ halts the AKE process by dropping the authentication messages, $RU_{y}$ can use old $PID^{x}$ for the AKE process. Therefore, SRUA-IoT is immune to de-synchronization attack. 
% \end{proof}
% \begin{prop}\label{esl} SRUA-IoT is resistant to ESL attack.
% \end{prop}
% \begin{proof} {Proof} In SRUA-IoT, both $RU_{y}$ and $SN_{x}$ compute SK as $SK_{x,y}$ $=$ $H(H(R_{1}$ $\parallel$ $ R_{2}$ $ \parallel$ $ R_{3})$ $\parallel $ $H(R_{1}$ $\parallel$ $ TS_{RU_{y}}$ $\parallel$ $ PID^{x})$ $\parallel$ $ T_{z}$ $ \parallel $ $PID_{SN_{x}})$. It is obvious that the calculated SK is the concoction of ephemeral (short term) parameters $R_{1}$, $ R_{2}$ and $ R_{3}$, and long term credential, $ TS_{RU_{y}}$, $PID_{SN_{x}}$, and $ PID^{x}$. $\mathcal{A}$ needs to compromise both ephemeral and long term credentials to reveal SK. Therefore, SRUA-IoT  is resistant to ESL attack.
% \end{proof}
% \begin{prop}SRUA-IoT ensures PFS.
% \end{prop}
% \begin{proof} From the discussion in Proposition \ref{esl}, it is clear that SK is the concatenation of fresh ephemeral and long term secret credentials. If $\mathcal{A}$ compromises SK of the previous AKE process but cannot compromise SK of the new AKE processes, then SRUA-IoT renders the PFS feature.
% \end{proof}
% \begin{prop} SRUA-IoT ensures secure MA.
% \end{prop}
% \begin{proof} In SRUA-IoT, $RU_{y}$ achieves validation on RC after verifying the condition $Auth_{a1}\stackrel{}{=} Auth_{a2}$. For this condition to hold, the knowledge of credentials $GK$, $ID_{G}$, and $TS_{RU_{y}}$ is required. To verify the condition at $SN_{x}$ $Auth_{a3}\stackrel{}{=} Auth_{a4}$, the knowledge of $TS_{SN_{x}}$ and $PID_{SN_{x}}$ is necessary. $SN_{x}$ achieves authentication on $SD_{RU_{y}}$  by validating the condition $Auth_{a5}\stackrel{}{=} Auth_{a6}$. Therefore, $RU_{y}$, $SN_{x}$, and $GW$ mutually validate each other to achieve secure mutual authentication.
% \end{proof}


% \subsection{SK security validation using random oracle model}
% We employ ROM to corroborate SK's security in
% SRUA-IoT. In ROM, $\mathcal{A}$ consociates with $k$th instance of a participating entity $EN^{k}$, which is involved in executing  SRUA-IoT. It can be a legitimate $RU_{y}$, $GW$ or $SN_{x}$. Therefore, $EN^{k}_{RU_{y}}$, $EN^{k}_{GW}$, and $EN^{k}_{SN_{x}}$ are $k^{\textup{th}}_{1}$, {$k^{\textup{th}}_{2}$, and $k^{\textup{th}}_{3}$} instances of $RU_{y}$, $GW$, and $SN_{x}$, respectively. To simulate real attacks, ROM considers various queries, namely, $Send$, $Test$, $Reveal$, $CorruptSD$, and $Execute$. A description of these queries is presented in Table \ref{tab:qureis}. Furthermore, SHA is modeled as a random oracle HR ($|HR|$ specifies the rage space of SHA output) and it is available for all SRUA-IoT executing entities including $\mathcal{A}$. By using the queries presented in Table \ref{tab:qureis}, the security of SK is proved in Theorem \ref{theo}.

% \begin{table}[t]
% 	\centering
% 	\caption{Description of different ROM queries}
% 	\scalebox{.7}{\begin{tabular}{| m{4.5cm} | m{7cm}| }
% 			%\hline \hline
% 			\toprule	\toprule[0.03cm] 
% 			\textbf{Query}	& \textbf{Description}	\\  [0.13cm] \hline 
% 			$Send (EN^{k}, MSG)$& This query enables $\mathcal{A}$ to launch an active attack by sending a message $MSG$ to $EN^{t}$, and $EN^{t}$ responds accordingly. 	\\  [0.13cm] \hline 
% 			$Test(EN^{k})$& This query enables $\mathcal{A}$ to make an SK request to $EN^{k}$. The response from $EN^{k}$ is probabilistic like flip coin $c$. 	\\  [0.13cm] \hline 
% 			$Reveal(EN^{k})$&This query eables $\mathcal{A}$ to procure an SK, established between $ EN^{t}$ and other partner entities. \\  [0.13cm] \hline 
% 			$CorruptSD(EN^{k}_{RU_{y}})$& By simulating this query, $\mathcal{A}$ can procure  $RU_{y}$'s secret information, namely, $PS_{RU_{y}}$, $ID_{RU_{y}}$, and $\beta_{k}$. 	\\  [0.13cm] \hline 
% 			\scalebox{.9}{$Execute(EN^{k}_{RU_{y}}, EN^{k}_{GW}, EN^{k}_{SN_{x}}\hspace{-0.5mm})$}	& This query enables $\mathcal{A}$ to capture all messages exchanged among $RU_{y}$, $GW$, and $SN_{x}$. \\  [0.13cm] \hline 
			
% 			\toprule	\toprule[0.03cm] 
% 			%\hline \hline
% 	\end{tabular}}
% 	\label{tab:qureis}
	
% \end{table}
% \begin{theorem}\label{theo}
% 	Suppose a polynomial-time $\mathcal{A}$ is running against the proposed SRUA-IoT in time $T_{i}$. If $QR^{}_{h}$ denotes the hash quires, $|HR|$ specifies the range space of SHA output, $SQ_{s}$ indicates the send queries,  $lbk$ defines the length of $\beta_{k}$ key, and $|PD|$ refers to the password dictionary, the approximated advantage  of $\mathcal{A}$ in breaching the security of SRUA-IoT for procuring SK between $RU_{y}$ and $SN_{x}$ can be defined as
% 	\begin{equation}
% 	AD^{SRUA-IoT}_{\mathcal{A}}(T_{i})\le\frac{QR^{2}_{h}}{|HR|}+\frac{SQ_{s}}{2^{lbk-1} |PD|}.
% 	\end{equation}
% \end{theorem}

% \begin{proof}
% 	 To prove this theorem, we consider the following four games $(GM_{x}|x=0,1,2,3)$.
% 	\subsubsection{$GM_{0}$}	
% 	A real security attack is accomplished by $\mathcal{A}$ against SRUA-IoT in $GM_{0}$. $\mathcal{A}$ picks $c$ bits at $GM_{0}$. Therefore, we can procure
% 	\begin{equation}
% 	AD_{SRUA-IoT}^{\mathcal {A}}(T_{i}) = |2.AD_{SRUA-IoT}^{\mathcal {A},GM_0} - 1|. 
% 	\end{equation}
	
% 	\subsubsection{$GM_{1}$}	
% 	In $GM_{1}$, $\mathcal{A}$ effectuates an eavesdropping attack and captures all the exchanged messages $ME_{a}:$\{$T_{x}$,$PID^{x}$, $G_{1}$, $Auth_{a1}\}$, $ME_{b}:$\{$T_{y}$, $G_{2}$, $G_{3}$,~ $Auth_{a3}$\}, and $ME_{c}:$\{$T_{z}$, $G_{4}$, $Auth_{a5}$\} during the AKE process of SRUA-IoT by utilizing the execute query defined in Table \ref{tab:qureis}. To procure SK, $\mathcal{A}$ executes the $Reveal$  and $Test$ queries and checks if the return key is a random string {or real key} at the completion of $GM_{1}$. The constructed SK between $RU_{y}$ and $SN_{x}$ is  $SK_{x,y}$ $=$ $H(H(R_{1}$ $\parallel$ $ R_{2}$ $ \parallel$ $ R_{3})$ $\parallel $ $H(R_{1}$ $\parallel$ $ TS_{RU_{y}}$ $\parallel$ $ PID^{x})$ $\parallel$ $ T_{z}$ $ \parallel $ $PID_{SN_{x}})$. $\mathcal{A}$ needs to know all the long-term secrets and other ephemeral numbers, which are known only to $RU_{y}$, $SN_{x}$, and RC. Hence by executing the eavesdropping attack, the chance of $\mathcal{A}$ to win the game will not be enhanced. Therefore, it is evident that
% 	\begin{equation}
% 	AD_{SRUA-IoT}^{\mathcal {A},GM_1} =AD_{SRUA-IoT}^{\mathcal {A},GM_0}.
% 	\end{equation}
% 	\subsubsection{$GM_{2}$}	
% 	{In $GM_{2}$,} $\mathcal{A}$ performs an active attack by simulating $Send$ and $Hash$ quires. All the exchanged messages {$ME_{a}$, $ME_{b}$, and $ME_{c}$} are protected using the collision resistance SHA function. The communicated message incorporates random number, timestamps, secret identities, and TSs. Therefore, no SHA collision will occur when $\mathcal{A}$ effectuates the $Send$ and $Hash$ quarries. By birthday paradox, the following can be achieved.
	
% 	\begin{equation} |AD_{SRUA-IoT}^{\mathcal {A},GM_1} -AD_{SRUA-IoT}^{\mathcal {A},GM_2}| \leq  QR^{2}_{h}/(2|HR|).  \end{equation}
	
% 	\subsubsection{$GM_{3}$}	
% 	This game effectuates the simulation of {$CorruptSD$} query. Typically, $RU_{y}$ picks low-entropy passwords. By utilizing the password dictionary attack, $\mathcal{A}$ tries to guess the password of $RU_{y}$ after procuring the information stored on $SD_{y}$, including \{$CT_{lo}$, $Auth_{y}$, $Rp$, $Gen(.)$, $Rep(.)$, $Et$\}. $\mathcal{A}$ also attempts to guess $\beta_{k}$ from the information stored on $SD_{y}$. SRUA-IoT employs robust $FE$ that generates highly random $\beta_{k}\in[0,1]^{lbk}$, where $lbk$ is the length of $\beta_{k}$. The probability of guessing  $\beta_{k}$ is nearly $\frac{1}{2^{lbk}}$. Furthermore, in the communication system, only a limited number of wrong password attempts are allowed. Under these conditions, we have  
% 	\begin{equation} |AD_{SRUA-IoT}^{\mathcal {A},GM_2} -AD_{SRUA-IoT}^{\mathcal {A},GM_3}| \leq \frac{SQ_{s}}{2^{lbk} |PD|} .  \end{equation}
	
% 	 After executing the above queries, $\mathcal{A}$ needs to guess {bit $c$} upon executing the $Test$ query. Therefore, we have $AD^{\mathcal{A},GM_3}_{{SRUA-IoT}}=\frac{1}{2}$ . 
	
% 	By utilizing the triangular inequality and simplifying {$(2)$-$(5)$}, the following is achieved: 
	
% 	\begin{equation}
% 	\begin{aligned}
% 	\frac{1}{2}AD_{SRUA-IoT}^{\mathcal {A}}(T_{i}) = |AD^{\mathcal{A},GM_3}_{{SRUA-IoT}}=\frac{1}{2}| \\
% 	=|AD_{SRUA-IoT}^{\mathcal {A},GM_1} -AD_{SRUA-IoT}^{\mathcal {A},GM_3}|  \\
% 	\le|AD_{SRUA-IoT}^{\mathcal {A},GM_1} -AD_{SRUA-IoT}^{\mathcal {A},GM_2}| \\
% 	+  |AD_{SRUA-IoT}^{\mathcal {A},GM_2} -AD_{SRUA-IoT}^{\mathcal {A},GM_3}|\\
% 	\le \frac{QR^{2}_{h}}{2|HR|}+\frac{SQ_{s}}{2^{lbk} |PD|}.~~~~~~~~~~~~~~~
% 	\end{aligned}
% 	\end{equation}
% 	\indent Hence, we get 
% 	\begin{equation}
% 	AD^{\mathcal{A}}_{SRUA-IoT}(T_{i})\le\frac{QR^{2}_{h}}{|HR|}+\frac{SQ_{s}}{2^{lbk-1} |PD|}.
% 	\end{equation}
% \end{proof}


% \subsection{Scyther analysis}
% We employ the well-known formal security validation tool, called Scyther \cite{cremers2008scyther}, to validate the security properties and correctness of the proposed SRUA-IoT scheme. To that end, the security protocol description language (SPDL) is utilized to specify SRUA-IoT by employing the operational semantics ascertained in \cite{cremers2008scyther}. 
% Fig. \ref{fig:SRUA-IoTScy} demonstrates that proclaims are  satisfied, which are specified in the SPDL script. In Fig. \ref{fig:SRUA-IoTScy}, SRUA-IoT is the name of the devised protocol with the initiator $RU$ and $RC$ as the helper node and $SN$  as the responder. The descriptions of Nisynch and secrecy are provided in \cite{cremers2008scyther}.  Secrecy signifies that specific information is not disclosed to any attacker, even when the information is exchanged over a public network. Furthermore, Nisynch describes that any claim defined in the devised protocol specification will also appear in the trace. Moreover,  SRUA-IoT analysis illustrates that the supplementary security characteristics produced by Scyther, namely, weak agreement (Weakagree), aliveness (Alive), and non-injective agreement (Niagree) are validated. 
% \begin{figure}[H]
% 	\centering
% % 		\includegraphics[width=8cm,height=.5cm]{Fig 4.tiff}
% 	\caption{Scyther results.}
% 	\label{fig:SRUA-IoTScy}
% \end{figure}


% \section{Performance Evaluation}\label{PE}
% In this section, the performance of SRUA-IoT is compared with  Park $et ~al.$\cite{park2016three}, Shuai $et ~al.$\cite{shuai2019anonymous}, Das $et ~al.$\cite{das2018biometrics},  Shin $et ~al.$\cite{shin2019lightweight}, Challa $et ~al.$\cite{challa2017secure}, Srinivas $et ~al.$\cite{srinivas2019tcalas}, Wazid $et ~al.$\cite{wazid2018design}, and Chen $et ~al.$\cite{chen2018lightweight} in terms of computational cost, communication cost, security features, and storage cost. We use  $C/C^{++}$ based cryptographic library MIRACL and  Raspberry PI-3 (RPI-3B) with Quad-core @1.2 GHz, 1BG of RAM, and Ubuntu 16.04 LTS for implementing the proposed SRUA-IoT and the relevant AKE schemes.

% \subsection{Security features}
% The proposed  SRUA-IoT is compared with the relevant AKE scheme in terms of security functionalities and resistance against various attacks. Table \ref{tab:SRUA-IoT-SC} exhibits that   Park $et ~al.$\cite{park2016three} is unprotected against UA, SSC, and PT attacks, Shuai $et ~al.$\cite{shuai2019anonymous} is unsafe against de-synchronization attacks, Das $et ~al.$\cite{das2018biometrics} cannot withstand SSC, PI, and UA attacks and does not ensure SK security,  Shin $et ~al.$\cite{shin2019lightweight} is insecure against de-synchronization attack and does not provide revocation phase, Challa $et ~al.$\cite{challa2017secure} { cannot withstand} PI, SSC, UA, PG, and UI attacks, Srinivas $et ~al.$\cite{srinivas2019tcalas} fails to protect against UI, PI, and SSC attacks, Wazid $et ~al.$\cite{wazid2018design} is unsafe against UI, PI, and SSC attacks,  and Chen $et ~al.$\cite{chen2018lightweight} cannot protect PI, PG, UA, UI, replay and DoS attacks and also does not ensure mutual authentication. Contrarily, SRUA-IoT is secure as compared to the relevant eminent AKE schemes, as shown in Table \ref{tab:SRUA-IoT-SC}. 
% \begin{table}[t]
% 	\centering
% 	\caption{Comparison of security features}
% 	\scalebox{0.45}[.4]{\begin{tabular}{cccccccccccc}
% 			%\hline \hline
% 			\toprule	\toprule[0.03cm] 
% 			{\textbf{Feature}}	& \textbf{ Park   $et ~al.$\cite{park2016three}}&\textbf{Shuai $et ~al.$\cite{shuai2019anonymous}}& \textbf{Das $et ~al.$\cite{das2018biometrics}} &\textbf{Shin  $et ~al.$\cite{shin2019lightweight}}&  \textbf{Challa $et ~al.$\cite{challa2017secure}}&\textbf{Srinivas  $et ~al.$\cite{srinivas2019tcalas}}&\textbf{Wazid  $et ~al.$\cite{wazid2018design}}&\textbf{Chen  $et ~al.$\cite{chen2018lightweight}}& \textbf{SRUA-IoT} \\  [0.13cm] \hline
% 			UA&$\times$&\checkmark&$\times$&\checkmark&$\times$&\checkmark&\checkmark &$\times$&\checkmark \\  
			
% 			UI&\checkmark&\checkmark&\checkmark&\checkmark&$\times$&$\times$&$\times$ &$\times$&\checkmark \\  
% 			DS&\checkmark&\checkmark&$\times$&$\times$&\checkmark&\checkmark&\checkmark &\checkmark&\checkmark \\  
% 			SSC/SSD&$\times$&$\times$&\checkmark&\checkmark&$\times$&$\times$& $\times$&\checkmark&\checkmark \\  
% 			PI&$\times$&$\times$&$\times$&\checkmark&$\times$&$\times$&$\times$ &$\times$&\checkmark \\  
% 			PG&\checkmark&$\times$&\checkmark&\checkmark&$\times$&\checkmark& \checkmark&$\times$ &\checkmark\\  
% 			UT&\checkmark&\checkmark&\checkmark&\checkmark&\checkmark&\checkmark&\checkmark &\checkmark &\checkmark\\  
% 			ESL&\checkmark&\checkmark&$\times$&\checkmark&\checkmark&\checkmark&\checkmark &\checkmark&\checkmark \\  
% 			SKS&\checkmark&\checkmark&$\times$&\checkmark&\checkmark&\checkmark&\checkmark &\checkmark&\checkmark \\  
% 			DoS&\checkmark&\checkmark&$\times$&\checkmark&\checkmark&\checkmark&\checkmark &$\times$&\checkmark \\  
% 			MITM&\checkmark&\checkmark&$\times$&\checkmark&\checkmark&\checkmark&\checkmark &\checkmark&\checkmark \\  
% 			RA&\checkmark&\checkmark&$\times$&\checkmark&\checkmark&\checkmark&\checkmark &$\times$&\checkmark \\  
% 			MA&\checkmark&\checkmark&\checkmark&\checkmark&\checkmark&\checkmark&\checkmark &\checkmark &\checkmark\\  	
% 			RP&\checkmark&\checkmark&$\times$&$\times$&\checkmark&\checkmark&\checkmark &\checkmark&\checkmark \\  
% 			NDD&\checkmark&\checkmark&\checkmark&\checkmark&\checkmark&\checkmark&\checkmark &\checkmark&\checkmark \\  
% 			BAN&\checkmark&\checkmark&$\times$&\checkmark&\checkmark&$\times$&$\times$ &\checkmark&\checkmark \\  
% 			ROM&\checkmark&\checkmark&\checkmark&\checkmark&\checkmark&\checkmark&$\times$ &\checkmark &\checkmark\\  
% 			\toprule	\toprule[0.03cm] 
% 			%\hline \hline
% 	\end{tabular}}
% 	\label{tab:SRUA-IoT-SC}
% 	\footnotesize {Note:  DS: de-synchronization,  RA: replay attack, SKS: SK security, ROM: validation using ROM. }
	
% \end{table}


% \subsection{Computational cost}
% In this subsection, the approximated computational overhead of SRUA-IoT and relevant AKE schemes is determined by using computational time of various cryptographic primitives presented in Table \ref{tab:timecostSURA}.  SRUA-IoT has a computational cost of $19T_{SA}$ $+$ $2T_{ED}$ $+$ $T_{\beta_{k}}\approx6.901$ ms, which is less than the benchmark schemes, as shown in Fig. \ref{fig:total-cost} and Table \ref{tab:ARUAKE-cost}. SRUA-IoT has 53.09\%, 23.88\%, 44.23\%, 29.56\%, 22.04\%, 76.41\%, 24.07\%, and 38.93\% less computational cost as compared to Park $et ~al.$\cite{park2016three}, Shuai $et ~al.$\cite{shuai2019anonymous}, Das $et ~al.$\cite{das2018biometrics}, Shin $et ~al.$\cite{shin2019lightweight}, Srinivas $et ~al.$\cite{srinivas2019tcalas}, Challa $et ~al.$\cite{challa2017secure}, Wazid $et ~al.$\cite{wazid2018design},  and Chen $et ~al.$\cite{chen2018lightweight}, respectively.
% Furthermore, SRUA-IoT has a computational overhead of $5T_{SA}\approx1.275$ms at $SN_{x}$, which is less than the benchmark AKE schemes, as shown in Fig. \ref{fig:SN-cost} and Table \ref{tab:ARUAKE-cost}.  {The computational overhead at $GW$ increases with the number of users accessing the network resources.} Fig. \ref{fig:server-comp-cost} shows that SRUA-IoT requires low computational overhead while processing multiple AKE requests simultaneously. 


% \begin{table}[t]
% 	\centering
% 	\caption{Experimental computational cost of various cryptographic operations }
% 	\scalebox{.8}{\begin{tabular}{lll}
% 			%\hline \hline
% 			\toprule	\toprule[0.03cm] 
% 			\textbf{Notation}	&\textbf{Operation}& \textbf{Computational time}  \\  \hline 
% 			$T_{SA}$ & Hash function& 0.255 ms  \\  \hline
% 			$T_{ED}$ & AES-192&0.350 ms   \\  \hline
% 			$T_{ECC}$ & ECC point multiplication& 1.9 ms \\  \hline
			
% 			$T_{Bk}\approx T_{ECC}$ & Fuzzy extractors& 1.9 ms  \\  \hline
% 			\toprule	\toprule[0.03cm] 
% 			%\hline \hline
% 	\end{tabular}}
% 	\label{tab:timecostSURA}
	
% \end{table}

% \begin{figure}[H]
% 	\centering
% % 	\includegraphics[width=8cm,height=0.5cm]{Fig 5.tiff}
% 	\caption{Comparison of total computation cost required to complete the AKE process.}
% 	\label{fig:total-cost}
% \end{figure}     
% \begin{figure}[H]
% 	\centering
% % 	\includegraphics[width=8cm,height=0.5cm]{Fig 6.tiff}
% 	\caption{Computational overhead at $SN_{x}$ side.}
% 	\label{fig:SN-cost}
% \end{figure}    
% \begin{figure}[H]
% 	\centering
% % 	\includegraphics[width=8cm, height=0.5cm]{Fig 7.tiff}
% 	\caption{Computational delay at $GW$ with increasing number of users.}
% 	\label{fig:server-comp-cost}
% \end{figure}

% \begin{table}[t]
% 	\centering
	
% 	\caption{Comparison of computational costs}
% 	\scalebox{0.65}{\begin{tabular}{lcccccc}
% 			%\hline \hline
% 			\toprule	\toprule[0.03cm] 
% 			\textbf{Scheme}	&$RU_{y}$ \textbf{Side}& $RC/CS$ \textbf{Side}& $D_{j}/SN_{x}$ \textbf{Side}  &  \textbf{Total Time}	\\  [0.13cm] \hline 
% 			Park $et ~al.$\cite{park2016three} &$10T_{SA}+2T_{EC}+T_{\beta_{k}}$  & $11T_{SA}$  &   $4T_{SA}+2T_{EC}\approx4.82$ ms& $25T_{SA} $$+$ $4T_{EC}$ $+$ $T_{\beta_{k}}\approx15.87$ ms\\  
			
% 			Shuai $et ~al.$\cite{shuai2019anonymous} &$6T_{SA}+T_{EC}$  & $7T_{SA}+T_{EC}$  &   $3T_{SA}+T_{EC}\approx2.665$ ms&$16T_{SA}$ $+$ $3T_{EC}\approx9.780$ ms\\  
			
% 			Das	$et ~al.$\cite{das2018biometrics} &$14T_{SA}+2T_{EC}+T_{\beta_{k}}$  & $9T_{SA}$  &   $7T_{SA}\approx1.785$ ms&  $30T_{SA}$ $+2T_{EC}$ $+$ $T_{\beta_{k}}\approx13.35
% 			$ ms\\    
% 			Shin $et ~al.$\cite{shin2019lightweight} &$13T_{SA}+T_{\beta_{k}}$  & $15T_{SA}$  &   $6T_{SA}\approx1.53$ ms& $34T_{SA}+T_{\beta_{k}}\approx10.570$ ms\\     
% 			Srinivas $et ~al.$\cite{srinivas2019tcalas} &$14T_{SA}+T_{\beta_{k}}$  & $9T_{SA}$  &   $7T_{SA}\approx1.785$ ms& $30T_{SA}$ $+$ $T_{\beta_{k}}\approx9.550$ ms\\     
% 			Challa $et ~al.$\cite{challa2017secure} &$5T_{SA}+5T_{EC}+T_{\beta_{k}}$& $4T_{SA}+5T_{EC}$  &  $3T_{SA}+4T_{EC}\approx8.365$ ms& $12T_{SA}+14T_{EC}$ $+$ $ T_{\beta_{k}}\approx31.560$ ms\\  
% 			Wazid $et ~al.$\cite{wazid2018design} &$16T_{SA}+T_{\beta_{k}}$  & $8T_{SA}$  &   $7T_{SA}\approx1.785$ ms&$30T_{SA}$ $+$ $T_{\beta_{k}}\approx9.805
% 			$ ms\\     
% 			Chen $et ~al.$\cite{chen2018lightweight} &$5T_{SA}+2T_{EC}$& $9T_{SA}$  &  $4T_{SA}+2T_{EC}\approx4.82$ ms & $18T_{SA}$ $+$ $4T_{EC}\approx12.19$ ms\\  
% 			SRUA-IoT   &$8T_{SA}+T_{ED}+T_{\beta_{k}}$  & $6T_{SA}+T_{ED}$  &   $5T_{SA}\approx1.275$ ms& $19T_{SA}$ $+$ $2T_{ED}$+ $T_{\beta_{k}}\approx7.445$ ms\\     
% 			\toprule	\toprule[0.03cm] 
% 			%\hline \hline
% 	\end{tabular}}
% 	\label{tab:ARUAKE-cost}
% \end{table}


% Although the security of SRUA-IoT is verified through formal and informal analyses in Section \ref{SA} where the scheme has been shown to resist various covert security attacks, however, an attack or some unexpected event can halt the execution of SRUA-IoT, which may occur at any step of the AKE phase. Under a specific attack, the execution time can be computed as
% \begin{equation} 
% T_{atp}=\frac {\sum^{100}_{i}T_{i}}{(1-{\mathrm{ attack~success~probability}})},
% \end{equation}
% where $T_{i}$ denotes time required to accomplish the AKE phase and $\sum^{100}_{i}T_{i}$ denotes the average time, which is procured after running SRUA-IoT 100 times, and $T_{atp}$ denotes the execution time required to complete the AKE phase under  successful attack probability. Fig. \ref{fig:atp}  demonstrates the time utilization of SRUA-IoT and other related schemes with attack success probability. Under various successful attack attempts, SRUA-IoT requires less time to complete its execution than the related AKE schemes.
% \begin{figure}[H]
% 	\centering
% % 	\includegraphics[width=8cm, height=0.5cm]{Fig 8.tiff}
% 	\caption{Computational overhead with attack success probability.}
% 	\label{fig:atp}
% \end{figure}  

% \subsection{Communication cost}
% The comparative analysis of communication cost is illustrated in this subsection. For SRUA-IoT, the size of timestamp is 32 bits, $ECC$ point is 160 bits, SHA output size is 160 bits, random number size is 80 bits, different $PID$ size is 80 bits, and AES key size is 192 bits. During the execution of the AKE phase, SRUA-IoT exchanges three message, namely, $ME_{a}:$ \{$T_{x}$,~$PID^{x}$,~ $G_{1}$,~ $Auth_{a1}\}$, $ME_{b}:$ \{$T_{y}$,~$G_{2}$,~ $G_{3}$,~ $Auth_{a3}$\, and $ME_{c}:$ \{$T_{z}$,~$G_{4}$,~  $Auth_{a5}$\}, of length \{32 + 80 + 160 + 160\} = 432 bits, \{32 + 160 + 160 + 160\} = 512 bits, and \{32 + 160 + 160\} = 412 bits, respectively. The aggregated communication overheads of SRUA-IoT is 1356 bits. Table \ref{tab:ARUA-comm-cost} and Fig. \ref{fig:6le-co-cost} demonstrate the comparison of SRUA-IoT and other related AKE schemes. SRUA-IoT has 75.92\%, 21.53\%, 11.72\%, 29.28\%, 46.36\%, 11.72\%, 20.05\%, and 57.2\% less communication cost as compared to  Park $et ~al.$\cite{park2016three}, Shuai $et ~al.$\cite{shuai2019anonymous}, Das $et ~al.$\cite{das2018biometrics}, Shin $et ~al.$\cite{shin2019lightweight}, Challa $et ~al.$\cite{challa2017secure}, Srinivas $et ~al.$\cite{srinivas2019tcalas}, and Chen $et ~al.$\cite{chen2018lightweight}, respectively.
% \begin{table}[t]
% 	\centering
	
% 	\caption{{Comparison of communication costs}}
% 	\scalebox{0.75}[0.75]{\begin{tabular}{lccc}
% 			%\hline \hline
% 			\toprule	\toprule[0.03cm] 
% 			\textbf{Scheme}	&\textbf{Messages Communicated During AKE Phase}& \textbf{Total (bits)}\\  [0.13cm] \hline 
% 			Park $et ~al.$\cite{park2016three}  & $RU_{y}\xrightarrow{1536}GW \xrightarrow{1408}SN_{x}\xrightarrow{1280}GW \xrightarrow{480} RU_{y}$  & 5632\\  
			
% 			Shuai $et ~al.$\cite{shuai2019anonymous}&$RU_{y}\xrightarrow{768}GW \xrightarrow{320}SN_{x}\xrightarrow{320}GW \xrightarrow{320} RU_{y}$ & 1728  \\  
% 			Das	$et ~al.$\cite{das2018biometrics} &$RU_{y}\xrightarrow{672}GW \xrightarrow{512}SN_{x}\xrightarrow{352} RU_{y}$& 1536   \\  
% 			Shin $et ~al.$\cite{shin2019lightweight} &$RU_{y}\xrightarrow{512}GW \xrightarrow{512}SN_{x}\xrightarrow{384}GW \xrightarrow{512} RU_{y}$ & 1920  \\  
			
% 			Challa $et ~al.$\cite{challa2017secure} & $RU_{y}\xrightarrow{992}GW \xrightarrow{1024}{j}\xrightarrow{512} RU_{y}$  &  2528 \\  
% 			Srinivas $et ~al.$\cite{srinivas2019tcalas} & $RU_{y}\xrightarrow{672}GW/RC \xrightarrow{512}SN_{x}\xrightarrow{352} RU_{y}$  & 1536  \\  
% 			Wazid $et ~al.$\cite{wazid2018design} & $RU_{y}\xrightarrow{672}GW/RC \xrightarrow{512}SN_{x}\xrightarrow{512} RU_{y}$  & 1696  \\   
% 			Chen $et ~al.$\cite{chen2018lightweight}  & $RU_{y}\xrightarrow{928}GW/RC \xrightarrow{672}SN_{x}\xrightarrow{896}GW/RC \xrightarrow{672}RU_{y}$  & 3168   \\  
% 			SRUA-IoT & $RU_{y}\xrightarrow{432}GW \xrightarrow{512}SN_{x}\xrightarrow{412}RU_{y}$  & 1356   \\  
% 			\toprule	\toprule[0.03cm] 
% 			%\hline \hline
% 	\end{tabular}}
% 	\label{tab:ARUA-comm-cost}
	
% \end{table}
% \begin{figure}[H]
% 	\centering
% % 	\includegraphics[width=8cm,height=0.5cm]{Fig 9.tiff}
% 	\caption{Communication overhead in the network with increasing  number of users.}
% 	\label{fig:6le-co-cost}
% \end{figure}


% \subsection{Storage cost}
% This subsection provides the storage cost comparison of SRUA-IoT with other AKE schemes. In SRUA-IoT, $RU_{y}$, $GW$, and $SN_{x}$ store \{$CT_{lo}$, $Auth_{y}$, $Rp$, $Gen(.)$, $Rep(.)$, $Et$\}, \{$PID^{x+1}$, $PID^{x}$, $RP_{RU_{y}}$, $CT_{RU_{y}}$\}, and \{$PID_{SN_{x}}$, $TS_{SN_{x}}$\} of length \{240 + 160 + 160 + 8\} = 568 bits, \{80 + 80 + 80 + 240\} = 480 bits, and \{80 + 80\} = 160 bits, respectively. The total storage overhead can be calculated as \{568 + 480 + 160\} = 1208 bits. Besides, the storage costs of   Park $et ~al.$\cite{park2016three}, Shuai $et ~al.$\cite{shuai2019anonymous}, Das $et ~al.$\cite{das2018biometrics}, Shin $et ~al.$\cite{shin2019lightweight}, Challa $et ~al.$\cite{challa2017secure}, 	Srinivas $et ~al.$\cite{srinivas2019tcalas}, Wazid $et ~al.$\cite{wazid2018design}, and Chen $et ~al.$\cite{chen2018lightweight} are 1600 bits, 1776 bits, 3738 bits, 1160 bits, 4016 bits, 2888 bits, 4126 bits, and 1792 bits, respectively. SRUA-IoT has a slightly higher storage cost as compared to Shin $et ~al.$\cite{shin2019lightweight}. However, SRUA-IoT has less computational and communication cost during the AKE phase in contrast to  Shin $et ~al.$\cite{shin2019lightweight}. Fig. \ref{fig:stor} illustrates the storage cost comparison of SRUA-IoT and the related AKE schemes.
% \begin{figure}[H]
% 	\centering
% % 	\includegraphics[width=8cm,height=0.5cm]{Fig 10.tiff}
% 	\caption{Comparison of storage costs.}
% 	\label{fig:stor}
% \end{figure}

% %\subsection{Discussion}
% %An AKE scheme, called SRUA-IoT, has been presented in this paper, enabling both the user and sensor node to establish an SK after performing MA. Moreover,  the security capabilities of SRUA-IoT are validated through informal and formal security analysis. Furthermore, it is demonstrated in the preceding subsection that SRUA-IoT consumes less storage, computational, and communication as compared to the related existing AKE scheme. SRUA-IoT requires many cryptographic operations to accomplish the AKE phase, which causes an increase in the execution time of SRUA-IoT. This deficiency of the SRUA-IoT will be coped with in future work by employing the lightweight cryptographic mechanism known as authenticated encryption with associative data (AEAD) scheme.  An AEAD scheme renders the function of authentication and confidentiality in its single operation. Moreover, an AEAD scheme demands fewer computational resources than the existing cryptographic algorithms while providing the same security level.}

% \section{Conclusion}\label{cn}

% Information security is critical in resource-constricted 6LoWPAN-based IoT networks. This paper has presented an AKE scheme called SRUA-IoT for resource-constricted 6LoWPAN devices to validate the legitimacy of remote users interacting in real-time with sensor nodes deployed in smart home networks. The scheme performs user authorization before procuring real-time data from sensors by employing a lightweight secure hash algorithm (SHA-160) and an advanced encryption standard (AES-192) to accomplish the AKE process. The proposed scheme is corroborated both formally and informally to explicate its resistance against various malicious security vulnerabilities. Moreover, numerical results in comparison with benchmarks reveal that SRUA-IoT requires low computational and communication resources in 6LoWPANs to accomplish the AKE phase. {Our future work will explore authenticated encryption with associated data to devise a resource-efficient AKE scheme with reduced computational cost for resource-constricted IoT devices.}


S1 Fig The user AKE phase of SRUA-IoT.

 S2 Fig Password change phase.
 
S3 Fig Revocation phase.
 
S4 Fig Scyther results.
 
S5 Fig Comparison of total computation cost required to complete the AKE process.
 
S6 Fig Computational overhead at $SN_x$ side.

S7 Fig Computational delay at GW with increasing number of users.
 
S8 Fig Computational overhead with attack success probability.

S9 Fig Communication overhead in the network with increasing number of users.
 
S10 Fig Comparison of storage costs.

S1  Table Comparative analysis of eminent AKE schemes

S2  Table List of key notations

S3  Table Description of different ROM queries

S4 Table Comparison of security features

S5 Table Experimental computational cost of various cryptographic operations 

S6 Table Comparison of computational costs

S7 Table Comparison of communication costs


\appendix 

\section*{Appendix }
\section{A Review of Shin $et~al.$\cite{shin2019lightweight}}\label{APP}
This section presents a critical review of the security scheme presented in \cite{shin2019lightweight}. We demonstrate that the scheme is insecure against de-synchronization attack. Table \ref{tab:shin-n} tabulates a list of notations used in \cite{shin2019lightweight}. 
\begin{table}[ht]
	\caption{ List of notations used in \cite{shin2019lightweight}}
	\centering
	\begin{tabular}{m{3.5cm}m{4.5cm}}
		%\hline \hline
		\toprule	\toprule[0.03cm] 
		\textbf{Symbol}& \textbf{Description}\\\hline
		HG, $U_{i}$, $SC_{i}$, and $S_{j}$& HG, user, smart card, and sensor node, respectively \\\hline
		$PID^{s1}_{i}$, $TID^{s}_{i}$, and $SID^{s}_{j}$& Pseudonym for $i$th login, user, and sensor node, temporary identities, respectively \\\hline
		$SK$, $K^{s}_{u}$, and $K^{s}_{s}$&Session Key, HG, and sensor node keys, respectively \\\hline
		$ID^{s}_{i}$, $PW^{s}_{i}$ $Bio^{s}_{i}$ &Identity, password, and bio-metric of $U_{i}$\\\hline
		$b^{s}_{i}$, $par^{s}_{i}$  & bio-metric key and reproduction parameters  \\\hline
		$T^{s}_{x}$, and $r^{s}_{x}$ & Timestamps and random numbers, where $x=1,2,3,4$   \\\hline
		%		$E_{EK}(st)$, $D_{DK}(st)$& Encryption/decryption of string $``st"$, respectively \\\hline
		$\parallel$, $\oplus$, $H(.)$ &Concatenation, XOR, and hash-function, respectively  \\\hline
		$Gen(.)$, $Rep(.)$ &FE bio-metric key generation, regeneration, reproduction function, respectively\\\hline
		\toprule	\toprule[0.03cm] 
		%\hline \hline
	\end{tabular}
	\label{tab:shin-n}
\end{table}  
\subsection{User registration phase}
\begin{itemize}
	\item $U_{i}$ picks $ID^{s}_{i}$, $PW^{s}_{i}$, and imprints its bio-metric $Bio^{s}_{i}$. $U_{i}$ selects a random number $u^{s}_{i}$, computes $(b^{s}_{i}, par^{s}_{i})$ $=$ $Gen(Bio^{s}_{i})$, $HPW=h(PW^{s}_{i}\parallel b^{s}_{i})$, $TID^{s}_{i}=h(ID^{s}_{i}\parallel u^{s}_{i})$, and dispatches a registration request $\langle TID^{s}_{i}, HPW^{s}_{i} \rangle$ to HG.
	\item Upon procuring user's registration message, $HG$ picks one-time pseudonym $PID^{s1}_{i}$ for $U_{i}$ and computes $HID^{s}_{i}$ $=$ $h(TID^{s}_{i}$ $\parallel$ $ K^{s}_{u})$, $A^{s}_{i}$ $=$ $h(HPW^{s}_{i}$ $\parallel$ $ TID^{s}_{i})$ $\oplus$ $ HID^{s}_{i}$, $B^{s}_{i}$ $=$ $h(HPW^{s}_{i}\parallel HID^{s}_{i})$, and $C^{s1}_{i}$ $=$ $h(TID^{s}_{i}$ $\parallel$ $ HID^{s}_{i})$ $\oplus$ $ PID^{s1}_{i}$.
	\item HG dispatches $SC_{i}$ to $U_{i}$ by storing \{$A^{s1}_{i}$, $B^{s1}_{i}$, $C^{s1}_{i}$\} via a secure channel and also stores \{$TID_{i}$, $PID^{s1}_{i}$\} in its database.
	\item Finally, $U_{i}$ computes $D^{s}_{i}$ $=$ $u^{s}_{i}\oplus h(ID^{s}_{i}\parallel b^{s}_{i})$ and stores the parameters \{$A^{s}_{i}$, $B^{s}_{i}$, $C^{s1}_{i}$, $D^{s}_{i}$, $par^{s}_{i}$, Gen(.), Rep(.)\} 
\end{itemize}
\subsection{Login and AKE phase}
\begin{itemize}
	\item $U_{i}$ inputs its  $ID^{s}_{i}$, $PW^{s}_{i}$, and imprints its bio-metric $Bio^{s}_{i}$ at the terminal available at $SC_{i}$. $U_{i}$ calculates $b^{s}_{i}$ $=$ $Rep(Bio^{s}_{i})$,  $ u^{s}_{i} $ $=$ $D^{s}_{i}\oplus h(ID^{s}_{i}\parallel b^{s}_{i})$,  $TID^{s}_{i}=h(ID^{s}_{i}\parallel u^{s}_{i})$,  $HID^{ss}_{i}$ $=$ $h(TID^{s}_{i}$ $\parallel$ $ K^{s}_{u})$, and $B^{ss}_{i}$ $=$ $h(HPW^{s}_{i}\parallel HID^{s}_{i})$. $SC_{i}$ passes the local authentication if  $B^{ss}_{i}$ and the stored $B^{s}_{i}$ are of the same value. Moreover, $SC_{i}$ picks a random number $r^{s}_{i}$ and  calculates $PID^{s1}_{i}$ $=$ $C^{s1}_{i}$ $\oplus$ $h(TID^{s}_{i}\parallel HID^{ss}_{i})$, $R^{s}_{i}$ $=h(TID^{s}_{i}$ $\parallel$ $ PID^{s1}_{i}$ $\parallel$ $ r^{s}_{i})$, $M^{s}_{i}$ $=$ $r^{s}_{i}\oplus$ $h(TID^{s}_{i}$ $\parallel $ $PID^{s1}_{i}$ $\parallel$ $ T^{s}_{1})$, and $M^{s}_{U,G}$$=$ $h(TID^{s}_{i}$ $\parallel$ $ HID^{ss}_{i}$ $\parallel$ $ PID^{s}_{i}$ $\parallel$ $ R^{s}_{i}$ $\parallel$ $ T^{s}_{i})$. Finally,  $SC_{i}$ dispatches a login message \{$T^{s}_{1}$, $PID^{s1}_{i}$, $M^{s}_{i}$, $M^{s}_{U_{i},G}$\} to HG via a public channel.
	\item After receiving the login message, HG validates the timestamp $\mid T^{s}_{1}-T^{s}_{1}\mid\le \delta T^{s}$ and retrieves $TID^{s}_{i}$ corresponding to $PID^{s}_{i}$. HG calculates $HID^{ss}_{i}$ $=$ $h(TID^{s}_{i}$ $\parallel$ $ K^{s}_{u})$, $r^{s}_{i}$ $=$ $M^{s}_{i}\oplus$ $h(TID^{s}_{i}$ $\parallel $ $PID^{s1}_{i}$ $\parallel$ $ T^{s}_{1})$,  $R^{s}_{i}$ $=h(TID^{s}_{i}$ $\parallel$ $ PID^{s1}_{i}$ $\parallel$ $ r^{s}_{i})$, and $M^{ss}_{U,G}$ $=$ $h(TID^{s}_{i}$ $\parallel$ $ HID^{ss}_{i}$ $\parallel$ $ PID^{s}_{i}$ $\parallel$ $ R^{s}_{i}$ $\parallel$ $ T^{s}_{i})$. To validate the integrity of the received message, HG compares $M^{s}_{U,G}$ and $M^{ss}_{U,G}$. If both are of the same value, HG believes that $U^{}_{i}$ is a valid user. Otherwise, HG aborts this phase. HG selects a sensor for $U^{}_{i}$, calculates $X^{s}_{j}$ $=$ $h(SID^{s}_{j}\parallel K^{s}_{s})$, $M^{s}_{G}$ $=R^{ss}_{i}$ $\oplus h(X^{s}_{j}$ $\parallel$ $ T^{s}_{2})$, and $M^{s}_{G,S_{j}}$ $=H(PID^{s1}_{i}$ $\parallel$ $ SID^{s}_{j}$ $\parallel X_{S_{j}}$ $\parallel$ $ R^{ss}_{i}$ $\parallel$ $ T^{s}_{2})$ and sends a message  \{$T^{s}_{2}$, $PID^{s1}_{i}$, $M^{s}_{G}$, $M^{s}_{G, S_{j}}$, $T^{s}_{3}$\} to $S_{j}$ through a public channel.
	\item $S_{j}$ validates the received message's freshness by checking $\mid T^{'s}_{2}-T^{s}_{2}\mid\le \delta T^{s}$, calculates $R^{ss}_{i}= M^{s}_{G}\oplus h(X^{s}_{j}\parallel T^{s}_{2})$, and  $M^{ss}_{U,S_{j}}=H(PID^{s1}_{i}$ $\parallel$ $ SID^{s}_{j}$ $\parallel X_{S_{j}}$ $\parallel$ $ R^{ss}_{i}$ $\parallel$ $ T^{s}_{2})$. $S_{j}$ compares $M^{ss}_{G,S_{j}}$ and $M^{s}_{G,S_{j}}$ to check the validity of message. Otherwise, $S_{j}$ terminates the authentication phase. Moreover, $S_{j}$ selects a random number $r^{s}_{j}$, calculates $M_{j}$  $=$ $r_{ss}$ $\oplus$ $h(X_{S_{j}}\parallel T_{3})$,  $R^{s}_{j}$ $=$ $h(SID^{s}_{j}$ $\parallel$ $ r^{s}_{j})$, $M^{s}_{j}$ $=$ $h(X^{s}_{j}$ $\parallel$ $ T^{s}_{3})$, $SK^{s}_{ij}$ $=$ $h(R^{ss}_{i}$ $\parallel$ $ R^{s}_{j})$ and $M^{s}_{S_{j}, HG}$ $=$ $h(PIDR^{s}_{i}$ $\parallel$ $ SID^{s}_{j}$ $\parallel$ $ X_{S_{j}}$ $\parallel$ $ R^{s}_{j}$ $\parallel$$ SK_{ij}$ $\parallel$ $ T_{3})$, and dispatches a message \{$T^{s}_{3}$, $M^{s}_{j}$, $M^{s}_{ S_{j}, G}$\} to HG via an unprotected channel.
	\item After receiving the message from $S_{j}$, HG checks the condition $\mid T^{'s}_{3}-T^{s}_{3}\mid\le \delta T^{s}$, calculates $r_{ss}$ $=$ $M_{j}$ $\oplus$ $h(X_{S_{j}}\parallel T_{3})$, $R^{ss}_{j}$ $=$ $h(SID^{s}_{j}$ $\parallel$ $ r^{s}_{j})$, $SK^{s}_{ij}$ $=$ $h(R^{ss}_{i}$ $\parallel$ $ R^{s}_{j})$, $M^{ss}_{S_{j}, HG}$ $=$ $h(PIDR^{s}_{i}$ $\parallel$ $ SID^{s}_{j}$ $\parallel$ $ X_{S_{j}}$ $\parallel$ $ R^{s}_{j}$ $\parallel$$ SK_{ij}$ $\parallel$ $ T_{3})$, and compares both $M^{ss}_{S_{j}, HG}$ and $M^{s}_{S_{j}, HG}$. If both are equal, HG believes that this messages is from a legitimate node.
	\item HG picks a new pseudonym $PID^{2s}_{i}$  and computes $C^{2s}_{i}$ $=$ $H(TID_{i}$ $\parallel$ $ HID^{ss}_{i})$ $\oplus$ $ PID^{2s}_{i}$, $p^{2s}_{i}$  $C^{s2}_{i}$ $\oplus$ $H( HID^{ss}_{i}\parallel T_{4})$, $M^{ss}_{G}$ $=$ $R^{ss}_{j}$ $\oplus$ $ h(PID^{s1}_{1}$ $\parallel$ $ HID^{ss}_{i})$, and $M^{s}_{G, U_{i}}$ $=$ $h(PID^{s}_{i}\parallel HID^{ss}_{i}\parallel C^{s2}_{i}\parallel R^{ss}_{j}\parallel SK_{ij}\parallel T^{s}_{4})$. Moreover, HG sends a message \{$T^{s}_{4}$, $P^{s2}_{i}$, $M^{si}_{G}$, $M^{s}_{G, U_{i}}$\} to $U_{i}$.
	\item After receiving the message from HG, $U_{i}$ ensures the message freshness by checking  $\mid T^{'s}_{4}-T^{s}_{4}\mid\le \delta T^{s}$. If the message is fresh then $U_{i}$ computes $R^{ss}_{j}$ $=$ $M^{ss}_{G}$  $\oplus$ $ h(PID^{s1}_{1}$ $\parallel$ $ HID^{ss}_{i})$, $C^{s2}_{i}$ $=$ $p^{2s}_{i}$  $\oplus$ $H( HID^{ss}_{i}\parallel T_{4})$, and $M^{ss}_{G, U_{i}}$ $=$ $h(PID^{s}_{i}\parallel HID^{ss}_{i}\parallel C^{s2}_{i}\parallel R^{ss}_{j}\parallel SK_{ij}\parallel T^{s}_{4})$. Finally, $U_{i}$ compares both  $M^{ss}_{G, U_{i}}$ and  $M^{s}_{G, U_{i}}$ to check the legitimacy of the received message. If the received message is valid then it updates $C^{s1}_{i}$ with  $C^{s2}_{i}$.
\end{itemize}

\subsection{Security analysis of \cite{shin2019lightweight}}
\subsubsection{De-synchronization attack}
De-synchronization attack is possible only when network entities need to have a matching state. The following steps demonstrate that the scheme is unprotected against de-synchronization attack.
\begin{itemize}
	\item There are four messages exchanged during the AKE phase, include \{$T^{s}_{1}$, $PID^{s1}_{i}$, $M^{s}_{i}$, $M^{s}_{U_{i},G}$\},  \{$T^{s}_{2}$, $PID^{s1}_{i}$, $M^{s}_{G}$, $M^{s}_{G, S_{j}}$\}, \{$T^{s}_{3}$, $M^{s}_{J}$, $M^{s}_{ S_{j}, G}$\}, and \{$T^{s}_{4}$, $P^{s2}_{i}$, $M^{si}_{G}$, $M^{s}_{G, U_{i}}$\}.  $PID^{s1}_{i}$ is used to search $TID^{s}_{i}$ in the database of $HG$. For every new AKE session in \cite{shin2019lightweight}, HG updates  $PID^{s1}_{i}$ to  $PID^{s2}_{i}$. HG sends  $PID^{s2}_{i}$ to $U_{i}$ in message \{$T^{s}_{4}$, $P^{s2}_{i}$, $M^{si}_{G}$, $M^{s}_{G, U_{i}}$\}.
	\item Let an adversary $\mathcal{A}$ eavesdrop all communicated messages, which are exchanged during the AKE phase. Let $\mathcal{A}$ drops the message \{$T^{s}_{4}$, $P^{s2}_{i}$, $M^{si}_{G}$, $M^{s}_{G, U_{i}}$\}, which is sent from HG to $U^{}_{i}$, prevents $U^{}_{i}$ from updating $PID^{s1}_{i}$ to $PID^{s2}_{i}$. If the current AKE fails, $U_{i}$ needs to use $PID^{s1}_{i}$. After receiving the new AKE request from $U_{i}$, HG searches $PID^{s1}_{i}$ in its database. HG will not find any record related to $PID^{s1}_{i}$ because in the last uncompleted AKE session, HG has updated $PID^{s1}_{i}$ to $PID^{s2}_{i}$. In this way, the new AKE request received from $U_{i}$ will fail. Therefore, $\mathcal{A}$ can effectuate the de-synchronization attack against the scheme of \cite{shin2019lightweight}.
\end{itemize}
\subsubsection{Design flaw} In the scheme of Shin $et~al$ \cite{shin2019lightweight}, HG broadcasts the message \{$T^{s}_{2}$, $PID^{s1}_{i}$, $M^{s}_{G}$, $M^{s}_{G, S_{j}}$\} to all sensor nodes deployed in the network. $U_{i}$ does not specify the sensor node from which it is going to procure the information. Thus, all  sensor nodes in the network will process the received message, which causes an extra computational overhead for every node. Therefore, $U_{i}$ must intimate to HG for accessing information from a specific sensor node. 

 


\section{Data Availability Statement} Minimal data set underlying the results described in this paper can be found at https://github.com/TanveerPhD/Minimal-data/blob/main/Data.ods

% \section{Conflict of Interest}
% The authors declare no conflict of interest.
% % \section{Acknowledgments}
% % Cras egestas velit mauris, eu mollis turpis pellentesque sit amet. Interdum et malesuada fames ac ante ipsum primis in faucibus. Nam id pretium nisi. Sed ac quam id nisi malesuada congue. Sed interdum aliquet augue, at pellentesque quam rhoncus vitae.

\nolinenumbers
\begin{thebibliography}{10}
\bibitem{shin2019lightweight}
Shin S, Kwon T.
\newblock A lightweight three-factor authentication and key agreement scheme in
  wireless sensor networks for smart homes.
\newblock Sensors. 2019;19(9):2012.

\end{thebibliography}
% \bibliography{mybib}
%  \bibliographystyle{plos2015}
% Either type in your references using
% \begin{thebibliography}{}
% \bibitem{}
% Text
% \end{thebibliography}
%
% or
%
% Compile your BiBTeX database using our plos2015.bst
% style file and paste the contents of your .bbl file
% here. See http://journals.plos.org/plosone/s/latex for 
% step-by-step instructions.
% 
% % \begin{thebibliography}{10}

% % \bibitem{bib1}
% % Conant GC, Wolfe KH.
% % \newblock {{T}urning a hobby into a job: how duplicated genes find new
% %   functions}.
% % \newblock Nat Rev Genet. 2008 Dec;9(12):938--950.

% % \bibitem{bib2}
% % Ohno S.
% % \newblock Evolution by gene duplication.
% % \newblock London: George Alien \& Unwin Ltd. Berlin, Heidelberg and New York:
% %   Springer-Verlag.; 1970.

% % \bibitem{bib3}
% % Magwire MM, Bayer F, Webster CL, Cao C, Jiggins FM.
% % \newblock {{S}uccessive increases in the resistance of {D}rosophila to viral
% %   infection through a transposon insertion followed by a {D}uplication}.
% % \newblock PLoS Genet. 2011 Oct;7(10):e1002337.

% \end{thebibliography}


\end{document}
