# Supplementary material for: A secure remote user authentication scheme for 6LoWPAN-based Internet of Things
Source: PLOS journal article supplement (doi:10.1371/journal.pone.0258279), 2021-11-08
Supplement: S13 (10.1371/journal.pone.0258279.s013) [file journal.pone.0258279.s013]

S3 Table Description of different ROM queries

| Query                                          | Description                                                                                                                           |
|------------------------------------------------|---------------------------------------------------------------------------------------------------------------------------------------|
| $Send(EN^k, MSG)$                              | This query enables $\mathcal{A}$ to launch an active attack by sending a message $MSG$ to $EN^t$ , and $EN^t$ responds accordingly.   |
| $Test(EN^k)$                                   | This query enables $\mathcal{A}$ to make an SK request to $EN^k$ . The response from $EN^k$ is probabilistic like flip coin $c$ .     |
| $Reveal(EN^k)$                                 | This query enables $\mathcal{A}$ to procure an SK, established between $EN^t$ and other partner entities.                             |
| $CorruptSD(EN_{RU_y}^k)$                       | By simulating this query, $\mathcal{A}$ can procure $RU_y$ 's secret information, namely, $PS_{RU_y}$ , $ID_{RU_y}$ , and $\beta_k$ . |
| $Execute(EN_{RU_y}^k, EN_{GW}^k, EN_{SN_x}^k)$ | This query enables $\mathcal{A}$ to capture all messages exchanged among $RU_y$ , $GW$ , and $SN_x$ .                                 |
