# Supplementary material for: A secure remote user authentication scheme for 6LoWPAN-based Internet of Things
Source: PLOS journal article supplement (doi:10.1371/journal.pone.0258279), 2021-11-08
Supplement: S18 (10.1371/journal.pone.0258279.s018) [file journal.pone.0258279.s018]

## Supporting Information

- S1 Fig The user AKE phase of SRUA-IoT.
- S2 Fig Password change phase.
- S3 Fig Revocation phase.
- S4 Fig Scyther results.
- S5 Fig Comparison of total computation cost required to complete the AKE process.
- S6 Fig Computational overhead at  $SN_x$  side.
- S7 Fig Computational delay at GW with increasing number of users.
- S8 Fig Computational overhead with attack success probability.
- S9 Fig Communication overhead in the network with increasing number of users.
- S10 Fig Comparison of storage costs.
- S1 Table Comparative analysis of eminent AKE schemes
- S2 Table List of key notations
- S3 Table Description of different ROM queries
- S4 Table Comparison of security features
- S5 Table Experimental computational cost of various cryptographic operations
- S6 Table Comparison of computational costs
- S7 Table Comparison of communication costs

## Appendix

### A A Review of Shin *et al.* [1]

This section presents a critical review of the security scheme presented in [1]. We demonstrate that the scheme is insecure against de-synchronization attack. Table 1 tabulates a list of notations used in [1].

#### A.1 User registration phase

- $U_i$  picks  $ID_i^s$ ,  $PW_i^s$ , and imprints its bio-metric  $Bio_i^s$ .  $U_i$  selects a random number  $u_i^s$ , computes  $(b_i^s, par_i^s) = Gen(Bio_i^s)$ ,  $HPW = h(PW_i^s \parallel b_i^s)$ ,  $TID_i^s = h(ID_i^s \parallel u_i^s)$ , and dispatches a registration request  $\langle TID_i^s, HPW_i^s \rangle$  to HG.
- Upon procuring user's registration message,  $HG$  picks one-time pseudonym  $PID_i^{s1}$  for  $U_i$  and computes  $HID_i^s = h(TID_i^s \parallel K_u^s)$ ,  $A_i^s = h(HPW_i^s \parallel TID_i^s) \oplus HID_i^s$ ,  $B_i^s = h(HPW_i^s \parallel HID_i^s)$ , and  $C_i^{s1} = h(TID_i^s \parallel HID_i^s) \oplus PID_i^{s1}$ .
- HG dispatches  $SC_i$  to  $U_i$  by storing  $\{A_i^{s1}, B_i^{s1}, C_i^{s1}\}$  via a secure channel and also stores  $\{TID_i, PID_i^{s1}\}$  in its database.
- Finally,  $U_i$  computes  $D_i^s = u_i^s \oplus h(ID_i^s \parallel b_i^s)$  and stores the parameters  $\{A_i^s, B_i^s, C_i^{s1}, D_i^s, par_i^s, Gen(.), Rep(.)\}$

**Table 1.** List of notations used in [1]

| Symbol                                   | Description                                                                           |
|------------------------------------------|---------------------------------------------------------------------------------------|
| HG, $U_i$ , $SC_i$ , and $S_j$           | HG, user, smart card, and sensor node, respectively                                   |
| $PID_i^{s1}$ , $TID_i^s$ , and $SID_j^s$ | Pseudonym for $i$ th login, user, and sensor node, temporary identities, respectively |
| $SK$ , $K_u^s$ , and $K_s^s$             | Session Key, HG, and sensor node keys, respectively                                   |
| $ID_i^s$ , $PW_i^s$ , $Bio_i^s$          | Identity, password, and bio-metric of $U_i$                                           |
| $b_i^s$ , $par_i^s$                      | bio-metric key and reproduction parameters                                            |
| $T_x^s$ , and $r_x^s$                    | Timestamps and random numbers, where $x = 1, 2, 3, 4$                                 |
| $\ $ , $\oplus$ , $H(\cdot)$             | Concatenation, XOR, and hash-function, respectively                                   |
| $Gen(\cdot)$ , $Rep(\cdot)$              | FE bio-metric key generation, regeneration, reproduction function, respectively       |

## A.2 Login and AKE phase

- $U_i$  inputs its  $ID_i^s$ ,  $PW_i^s$ , and imprints its bio-metric  $Bio_i^s$  at the terminal available at  $SC_i$ .  $U_i$  calculates  $b_i^s = Rep(Bio_i^s)$ ,  $u_i^s = D_i^s \oplus h(ID_i^s \| b_i^s)$ ,  $TID_i^s = h(ID_i^s \| u_i^s)$ ,  $HID_i^{ss} = h(TID_i^s \| K_u^s)$ , and  $B_i^{ss} = h(HPW_i^s \| HID_i^s)$ .  $SC_i$  passes the local authentication if  $B_i^{ss}$  and the stored  $B_i^s$  are of the same value. Moreover,  $SC_i$  picks a random number  $r_i^s$  and calculates  $PID_i^{s1} = C_i^{s1} \oplus h(TID_i^s \| HID_i^{ss})$ ,  $R_i^s = h(TID_i^s \| PID_i^{s1} \| r_i^s)$ ,  $M_i^s = r_i^s \oplus h(TID_i^s \| PID_i^{s1} \| T_1^s)$ , and  $M_{U,G}^s = h(TID_i^s \| HID_i^{ss} \| PID_i^{s1} \| R_i^s \| T_i^s)$ . Finally,  $SC_i$  dispatches a login message  $\{T_1^s, PID_i^{s1}, M_i^s, M_{U,G}^s\}$  to HG via a public channel.
- After receiving the login message, HG validates the timestamp  $|T_1^s - T_1^s| \leq \delta T^s$  and retrieves  $TID_i^s$  corresponding to  $PID_i^{s1}$ . HG calculates  $HID_i^{ss} = h(TID_i^s \| K_u^s)$ ,  $r_i^s = M_i^s \oplus h(TID_i^s \| PID_i^{s1} \| T_1^s)$ ,  $R_i^s = h(TID_i^s \| PID_i^{s1} \| r_i^s)$ , and  $M_{U,G}^{ss} = h(TID_i^s \| HID_i^{ss} \| PID_i^{s1} \| R_i^s \| T_i^s)$ . To validate the integrity of the received message, HG compares  $M_{U,G}^s$  and  $M_{U,G}^{ss}$ . If both are of the same value, HG believes that  $U_i$  is a valid user. Otherwise, HG aborts this phase. HG selects a sensor for  $U_i$ , calculates  $X_j^s = h(SID_j^s \| K_s^s)$ ,  $M_G^s = R_i^{ss} \oplus h(X_j^s \| T_2^s)$ , and  $M_{G,S_j}^s = H(PID_i^{s1} \| SID_j^s \| X_{S_j}^s \| R_i^{ss} \| T_2^s)$  and sends a message  $\{T_2^s, PID_i^{s1}, M_G^s, M_{G,S_j}^s, T_3^s\}$  to  $S_j$  through a public channel.
- $S_j$  validates the received message's freshness by checking  $|T_2^s - T_2^s| \leq \delta T^s$ , calculates  $R_i^{ss} = M_G^s \oplus h(X_j^s \| T_2^s)$ , and  $M_{U,S_j}^{ss} = H(PID_i^{s1} \| SID_j^s \| X_{S_j}^s \| R_i^{ss} \| T_2^s)$ .  $S_j$  compares  $M_{G,S_j}^s$  and  $M_{G,S_j}^s$  to check the validity of message. Otherwise,  $S_j$  terminates the authentication phase. Moreover,  $S_j$  selects a random number  $r_j^s$ , calculates  $M_j = r_{ss} \oplus h(X_{S_j}^s \| T_3^s)$ ,  $R_j^s = h(SID_j^s \| r_j^s)$ ,  $M_j^s = h(X_j^s \| T_3^s)$ ,  $SK_{ij}^s = h(R_i^{ss} \| R_j^s)$  and  $M_{S_j,HG}^s = h(PID_i^{s1} \| SID_j^s \| X_{S_j}^s \| R_j^s \| SK_{ij}^s \| T_3^s)$ , and dispatches a message  $\{T_3^s, M_j^s, M_{S_j,G}^s\}$  to HG via an unprotected channel.
- After receiving the message from  $S_j$ , HG checks the condition  $|T_3^s - T_3^s| \leq \delta T^s$ ,

calculates  $r_{ss} = M_j \oplus h(X_{S_j} \parallel T_3)$ ,  $R_j^{ss} = h(SID_j^s \parallel r_j^s)$ ,  $SK_{ij}^s = h(R_i^{ss} \parallel R_j^s)$ ,  $M_{S_j, HG}^{ss} = h(PID_i^s \parallel SID_j^s \parallel X_{S_j} \parallel R_j^s \parallel SK_{ij}^s \parallel T_3)$ , and compares both  $M_{S_j, HG}^{ss}$  and  $M_{S_j, HG}^s$ . If both are equal, HG believes that this messages is from a legitimate node.

- HG picks a new pseudonym  $PID_i^{2s}$  and computes  $C_i^{2s} = H(TID_i \parallel HID_i^{ss}) \oplus PID_i^{2s}$ ,  $p_i^{2s} = C_i^{s2} \oplus H(HID_i^{ss} \parallel T_4)$ ,  $M_G^{ss} = R_j^{ss} \oplus h(PID_1^{s1} \parallel HID_i^{ss})$ , and  $M_{G, U_i}^s = h(PID_i^s \parallel HID_i^{ss} \parallel C_i^{s2} \parallel R_j^{ss} \parallel SK_{ij}^s \parallel T_4^s)$ . Moreover, HG sends a message  $\{T_4^s, P_i^{s2}, M_G^{si}, M_{G, U_i}^s\}$  to  $U_i$ .
- After receiving the message from HG,  $U_i$  ensures the message freshness by checking  $|T_4^s - T_4^s| \leq \delta T^s$ . If the message is fresh then  $U_i$  computes  $R_j^{ss} = M_G^{ss} \oplus h(PID_1^{s1} \parallel HID_i^{ss})$ ,  $C_i^{s2} = p_i^{2s} \oplus H(HID_i^{ss} \parallel T_4)$ , and  $M_{G, U_i}^{ss} = h(PID_i^s \parallel HID_i^{ss} \parallel C_i^{s2} \parallel R_j^{ss} \parallel SK_{ij}^s \parallel T_4^s)$ . Finally,  $U_i$  compares both  $M_{G, U_i}^{ss}$  and  $M_{G, U_i}^s$  to check the legitimacy of the received message. If the received message is valid then it updates  $C_i^{s1}$  with  $C_i^{s2}$ .

### A.3 Security analysis of [1]

#### A.3.1 De-synchronization attack

De-synchronization attack is possible only when network entities need to have a matching state. The following steps demonstrate that the scheme is unprotected against de-synchronization attack.

- There are four messages exchanged during the AKE phase, include  $\{T_1^s, PID_i^{s1}, M_i^s, M_{U_i, G}^s\}$ ,  $\{T_2^s, PID_i^{s1}, M_G^s, M_{G, S_j}^s\}$ ,  $\{T_3^s, M_j^s, M_{S_j, G}^s\}$ , and  $\{T_4^s, P_i^{s2}, M_G^{si}, M_{G, U_i}^s\}$ .  $PID_i^{s1}$  is used to search  $TID_i^s$  in the database of HG. For every new AKE session in [1], HG updates  $PID_i^{s1}$  to  $PID_i^{s2}$ . HG sends  $PID_i^{s2}$  to  $U_i$  in message  $\{T_4^s, P_i^{s2}, M_G^{si}, M_{G, U_i}^s\}$ .
- Let an adversary  $\mathcal{A}$  eavesdrop all communicated messages, which are exchanged during the AKE phase. Let  $\mathcal{A}$  drops the message  $\{T_4^s, P_i^{s2}, M_G^{si}, M_{G, U_i}^s\}$ , which is sent from HG to  $U_i$ , prevents  $U_i$  from updating  $PID_i^{s1}$  to  $PID_i^{s2}$ . If the current AKE fails,  $U_i$  needs to use  $PID_i^{s1}$ . After receiving the new AKE request from  $U_i$ , HG searches  $PID_i^{s1}$  in its database. HG will not find any record related to  $PID_i^{s1}$  because in the last uncompleted AKE session, HG has updated  $PID_i^{s1}$  to  $PID_i^{s2}$ . In this way, the new AKE request received from  $U_i$  will fail. Therefore,  $\mathcal{A}$  can effectuate the de-synchronization attack against the scheme of [1].

#### A.3.2 Design flaw

In the scheme of Shin *et al* [1], HG broadcasts the message  $\{T_2^s, PID_i^{s1}, M_G^s, M_{G, S_j}^s\}$  to all sensor nodes deployed in the network.  $U_i$  does not specify the sensor node from which it is going to procure the information. Thus, all sensor nodes in the network will process the received message, which causes an extra computational overhead for every node. Therefore,  $U_i$  must intimate to HG for accessing information from a specific sensor node.

## B Data Availability Statement

Minimal data set underlying the results described in this paper can be found at <https://github.com/TanveerPhD/Minimal-data/blob/main/Data.ods>

## References

1. Shin S, Kwon T. A lightweight three-factor authentication and key agreement scheme in wireless sensor networks for smart homes. *Sensors*. 2019;19(9):2012.
